# Supplementary material
Source: PubMed Central journal article supplement (PMC5389415)
Supplement: NIHMS854918-supplement-supplement_1.pdf [file NIHMS854918-supplement-supplement_1.pdf]

Supporting Information for:

## Atomic Resolution Structure of Monomorphic A $\beta$ <sub>42</sub> Amyloid Fibrils

Michael T. Colvin<sup>†,§</sup>, Robert Silvers<sup>†,§</sup>, Qing Zhe Ni<sup>†</sup>, Thach V. Can<sup>†</sup>, Ivan Sergeyev<sup>°</sup>, Melanie Rosay<sup>°</sup>, Kevin J. Donovan<sup>†</sup>, Brian Michael<sup>†</sup>, Joseph Wall<sup>‡</sup>, Sara Linse<sup>‡</sup>, and Robert G. Griffin<sup>†,\*</sup>

Email [rgg@mit.edu](mailto:rgg@mit.edu)

<sup>†</sup>Department of Chemistry and Francis Bitter Magnet Laboratory

Massachusetts Institute of Technology

Cambridge, Massachusetts 02139

<sup>‡</sup>Department of Biochemistry and Structural Biology

Lund University

SE22100 Lund, Sweden

<sup>‡</sup>Brookhaven National Laboratory

50 Bell Avenue, Building 463

Upton, NY 11973-5000, USA

<sup>°</sup>Bruker BioSpin, 15 Fortune Drive, Billerica, MA 01821

<sup>§</sup> M.T.C. and R.S. contributed equally to this work.

The MPL measurements were performed on 4 grids: undiluted U-<sup>13</sup>C/<sup>15</sup>N-A□<sub>M01-42</sub> taken from an NMR sample, 3x dilution, 10x dilution and an extra 10x dilution which had too much ice to load in the freeze dry. The last grid was warmed, blotted to remove extra water and re-frozen. All four were freeze dried. The undiluted sample showed no isolated filaments. The other grids had thin straight filaments ~2.5+/-15% kDa/A and thicker sometimes twisted filaments ~4.5+/-10% kDa/A in addition to TMV. After extensive searching the samples revealed some fairly clean areas. The TMV M/L varied considerably from area to area, due to salt and did not correlate with filament M/L so we did not try to re-normalize the mass calibration to give 13.1 kDa/A. The ~2.5kDa/A filaments are in the minority and appear to be twisted. The dominant species is the ~5kDa/A filament that is clearly twisted and sometimes separated into parallel strands.

In addition to the ~2.5 and ~4.9 kDa/Å filaments, there were a few very thin filaments with M/L ~1.3kDa/A and a few with M/L ~7.5 kDa/A. In some cases the thick filaments appear to be made up of two thin filaments side-by-side with a cleft between them. Often there were abrupt transitions where one of the "pair" would terminate. All appeared to have blunt ends.

The mass measurements were performed with PCMass32 available on <ftp.stem.bnl.gov> used for automatically selecting particles and viewing blemishes (in the image minus model display). The measurement proceeds in 5 steps:

1. The program masks out objects significantly above background noise and measures the background level in the remaining areas and the dose (via counting statistics).
2. A threshold (based on model) is set and the program traces the perimeter of areas above the threshold, comparing to max & min diameters (or length) of the model.
3. Models appropriate for an area are refined against the image data (centering, size, amplitude, orientation, twist, curvature, etc.) and areas satisfying selection criteria are submitted for mass, M/L or M/Area measurement. All model parameters, fitting parameters and measurements are stored in a file nkxxxxyy.SMM (STEM Mass Measurement) which is read back in whenever the image nkxxxxyy.dat is viewed.
4. An operator steps through each measurement to judge quality. For short filaments the measuring rectangle may extend past the end of the filament. The image may have bright spots (salt or heavy atoms) or "blemishes" that are evident in the image minus model display. Those measurements are deleted by changing the mass value to negative (that can be change back to positive later if a mistake was made). Areas missed by the automatic selection can be entered manually.
5. A database program reads the nkxxxxyy.SMM files in a specified range and computes mean, SD and N for each model in that file, as well as global averages and histograms. If the background and TMV are of high quality, the program can scale the mass calibration to give TMV=13.1 kDa/A.

For a clean specimen with good preservation, the accuracy is determined by counting statistics and fluctuations in substrate thickness. At a dose of 10el/A\*\*2 the TMV SD is expected to be <2% and the 2.5 kDa/A filament <5%. That is achieved in many of the A□<sub>M01-42</sub> images, but the fluctuation from one image to another is larger than expected due to background residue. Salt deposits tend to accumulate in the crevice where the TMV (which is very rigid) touches the substrate. Therefore a high TMV value is usually a reliable indicator of salt or other problems. The radial density profile of the TMV can be significantly altered and the central hole filled in. Thin filaments may be less rigid and flattened so they do not accumulate residue to the same extent, making scaling for TMV value incorrect. A useful indicator of overall quality is the SD of the means for individual images.

An additional problem with your data is the strong tendency of your filaments to attract heavy atom bright spots. This has been seen before with  $\alpha$ -synuclein and may indicate specific binding. It is not present in TMV particles in the same image. It may increase the M/L of thin filaments by as much as 5%.

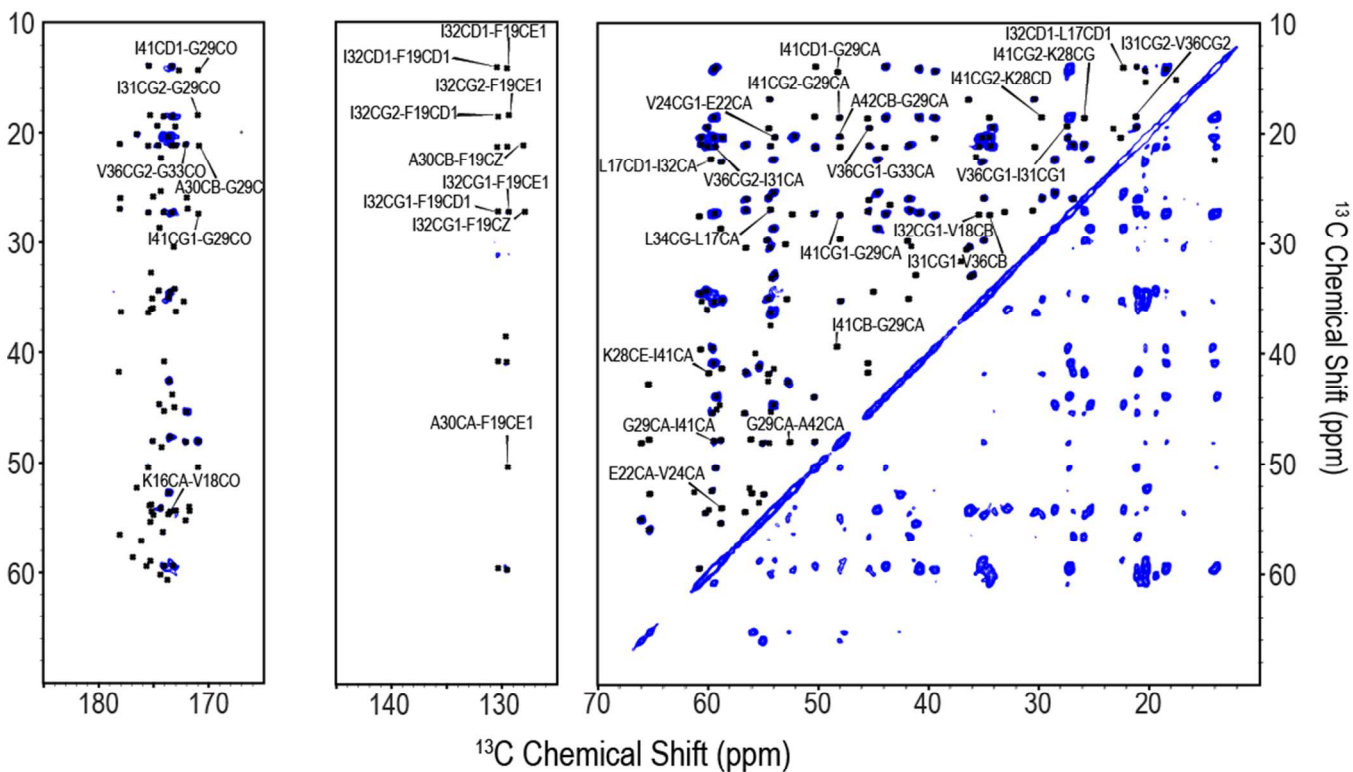

**Figure S1.** 2D  $^{13}\text{C}$ - $^{13}\text{C}$  MAS PAR spectrum of 30 % U- $^{13}\text{C}/^{15}\text{N}$ - $\text{A}\beta_{\text{M}01-42}$  fibrils recorded at  $\omega_{\text{H}}/2\pi=800\text{MHz}$ ,  $T=277\text{K}$ ,  $\omega_r/2\pi=20\text{kHz}$ .  $\tau_{\text{mix}}=20$  ms, and  $\omega_{\text{H}}/2\pi = 83$  kHz decoupling field. For optimal PAR mixing, the radio frequency (RF) fields were set to  $\omega_{^{13}\text{C}}/2\pi=62.5$  kHz and  $\omega_{\text{H}}/2\pi=55$  kHz on the  $^{13}\text{C}$  and  $^1\text{H}$  channels, respectively.

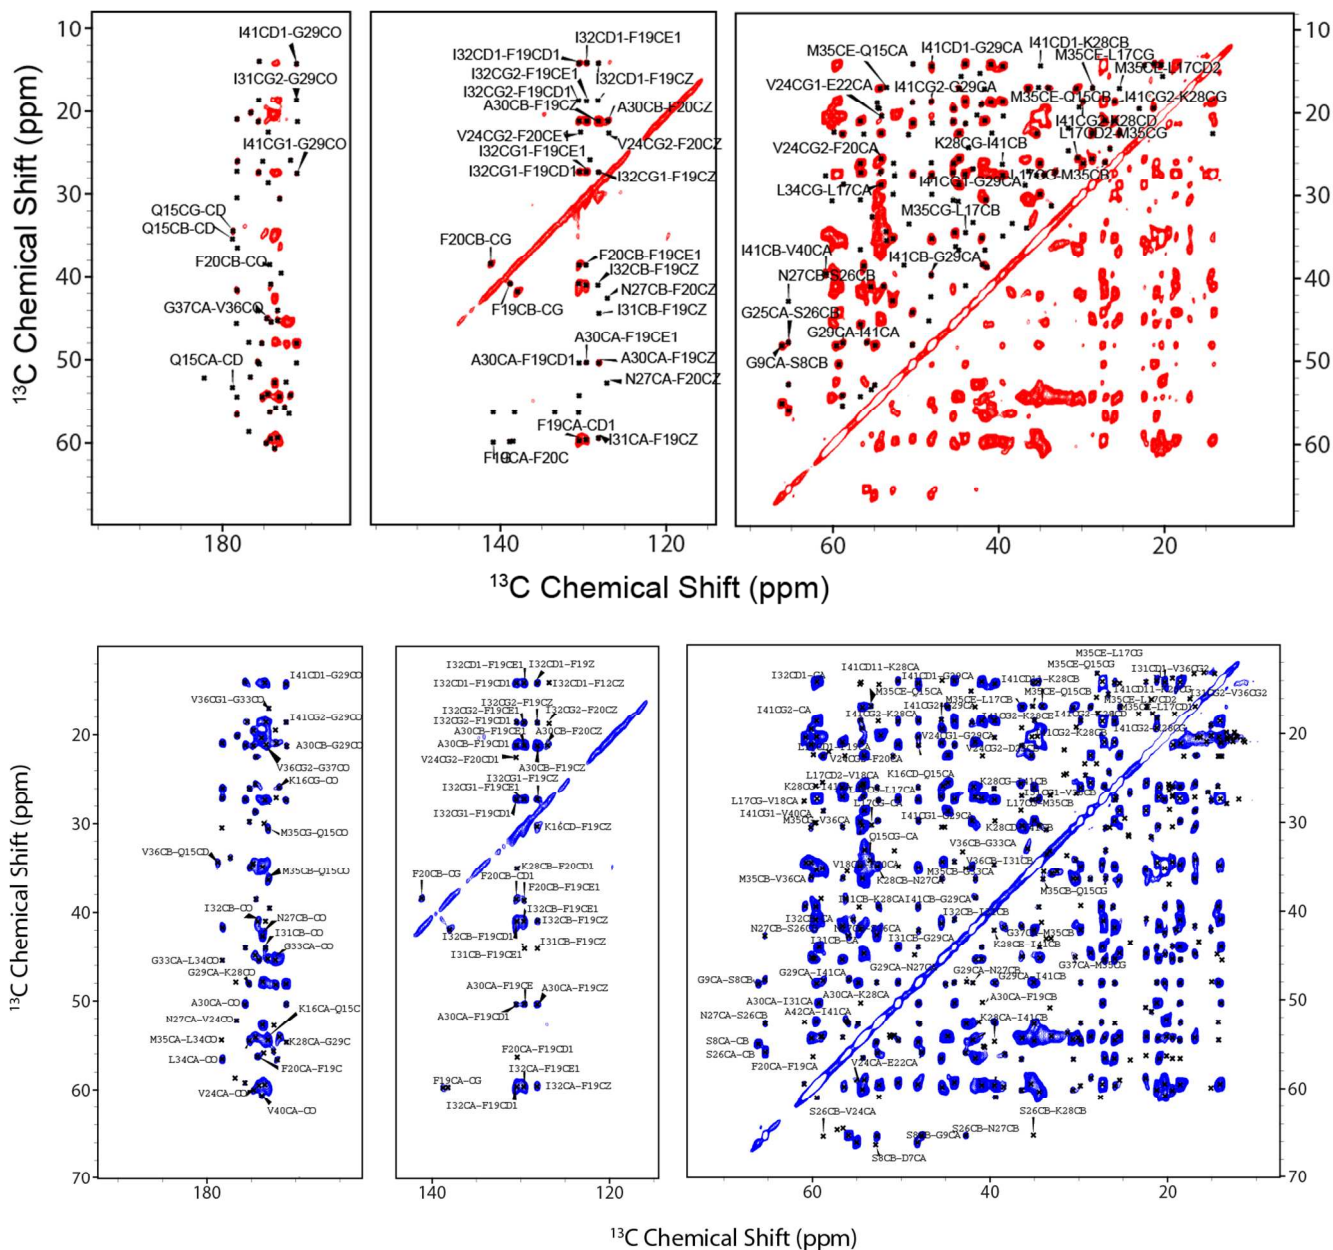

**Figure S2.** 2D  $^{13}\text{C}$ - $^{13}\text{C}$  MAS PAR spectrum of U- $^{13}\text{C}/^{15}\text{N}$ -A $\beta_{\text{M01-42}}$  fibrils recorded at  $\omega_{\text{0H}}/2\pi=800\text{MHz}$ ,  $T=277\text{K}$ ,  $\omega_r/2\pi=20\text{kHz}$ .  $\tau_{\text{mix}}=(\text{a})$  5 ms (shown in red) and (b) 10 ms (shown in blue), and  $\omega_{\text{1H}}/2\pi=83\text{kHz}$  decoupling field. For optimal PAR mixing, the radio frequency (RF) fields were set to  $\omega_{13}/2\pi=62.5\text{kHz}$  and  $\omega_{\text{1H}}/2\pi=55\text{kHz}$  on the  $^{13}\text{C}$  and  $^1\text{H}$  channels, respectively. Several important inter-residue cross peaks are denoted with red labels in the expanded region of the spectrum.

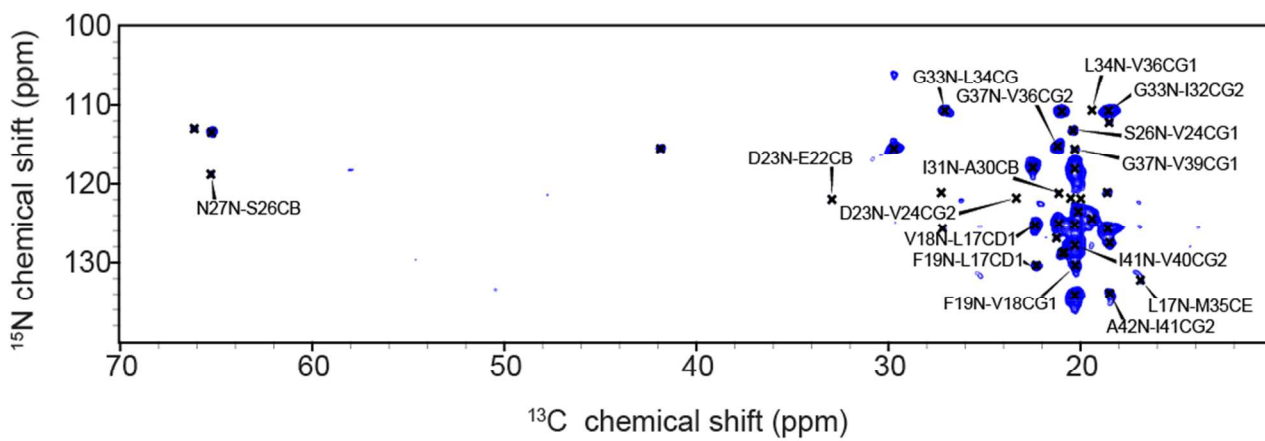

**Figure S3.** 2D ZF-TEDOR spectrum of 1,6 $^{13}\text{C}_2$ -glucose labeled  $\text{A}\beta_{\text{M01-42}}$  fibrils recorded at 800 MHz,  $\omega_r/2\pi=20.0$  kHz, VT gas regulated to 277 K with 83 kHz TPPM during acquisition.

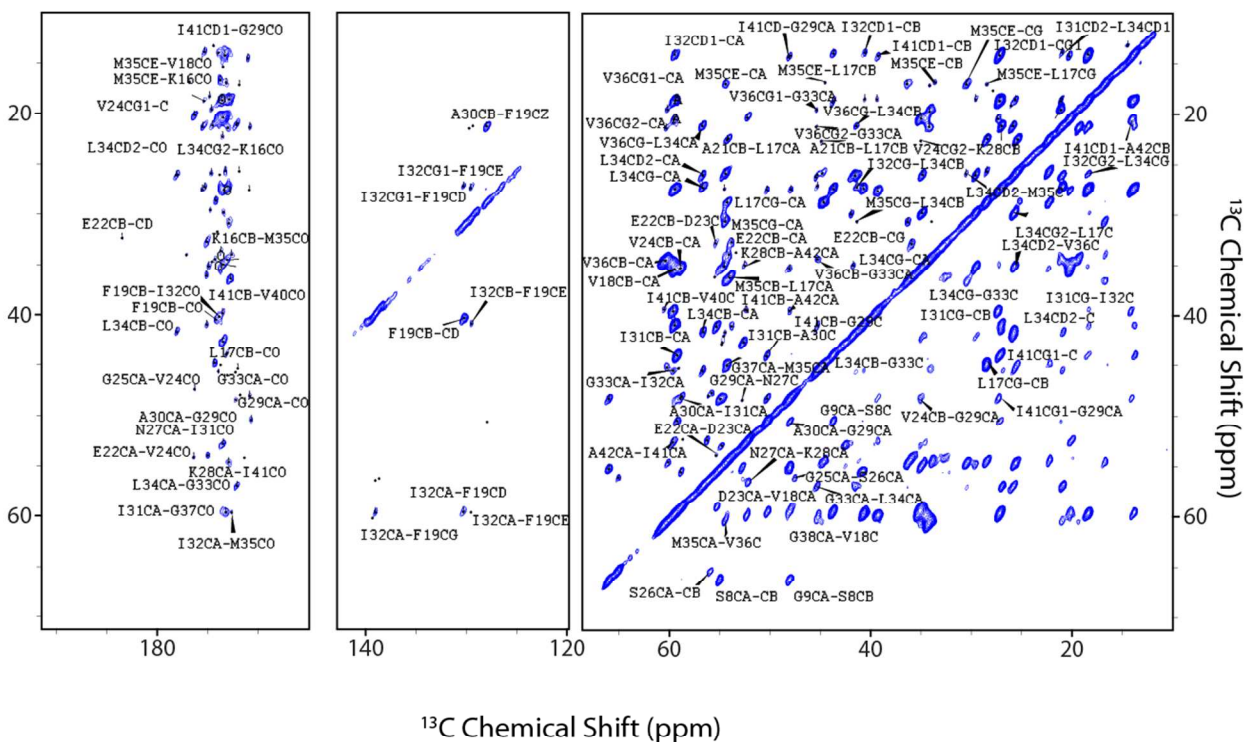

**Figure S4.** 2D  $^{13}\text{C}$ - $^{13}\text{C}$  MAS PAR spectrum of  $[2\text{-}^{13}\text{C}_1 \text{ glycerol}/1,3\text{-}^{13}\text{C}_2 \text{ glycerol mixed sample}]/^{15}\text{N}\text{-A}\beta_{\text{M01-42}}$  fibrils recorded at  $\omega_{\text{0H}}/2\pi=800\text{MHz}$ ,  $T=277\text{K}$ ,  $\omega_r/2\pi=20\text{kHz}$ .  $\tau_{\text{mix}}=20 \text{ ms}$ , and  $\omega_{\text{1H}}/2\pi = 83 \text{ kHz}$  decoupling field. For optimal PAR mixing, the radio frequency (RF) fields were set to  $\omega_{\text{13C}}/2\pi=62.5 \text{ kHz}$  and  $\omega_{\text{1H}}/2\pi=55 \text{ kHz}$  on the  $^{13}\text{C}$  and  $^1\text{H}$  channels, respectively.

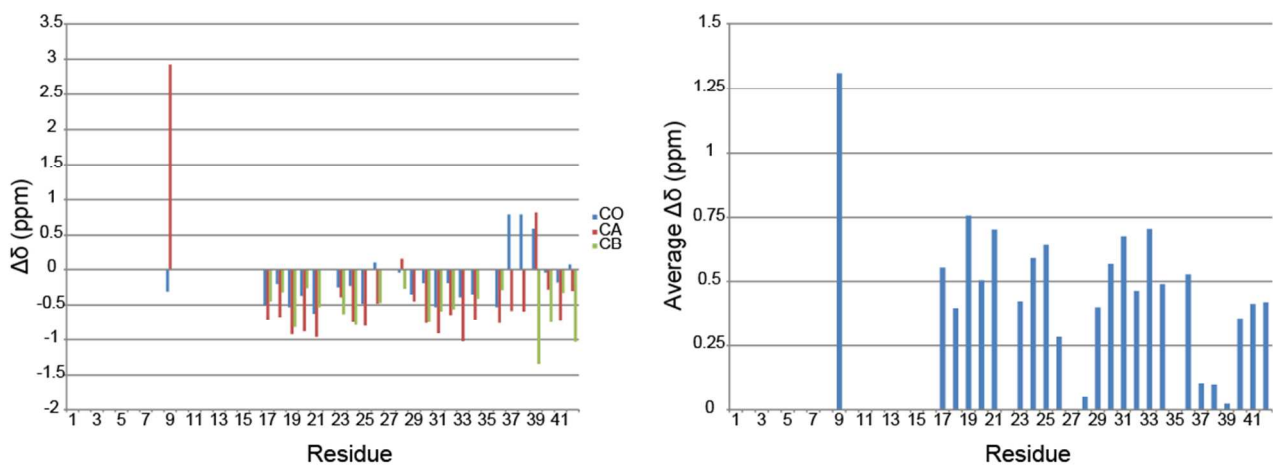

**Figure S5.** Comparison of chemical shifts for residues observed by Ishii alongside those reported by us previously.

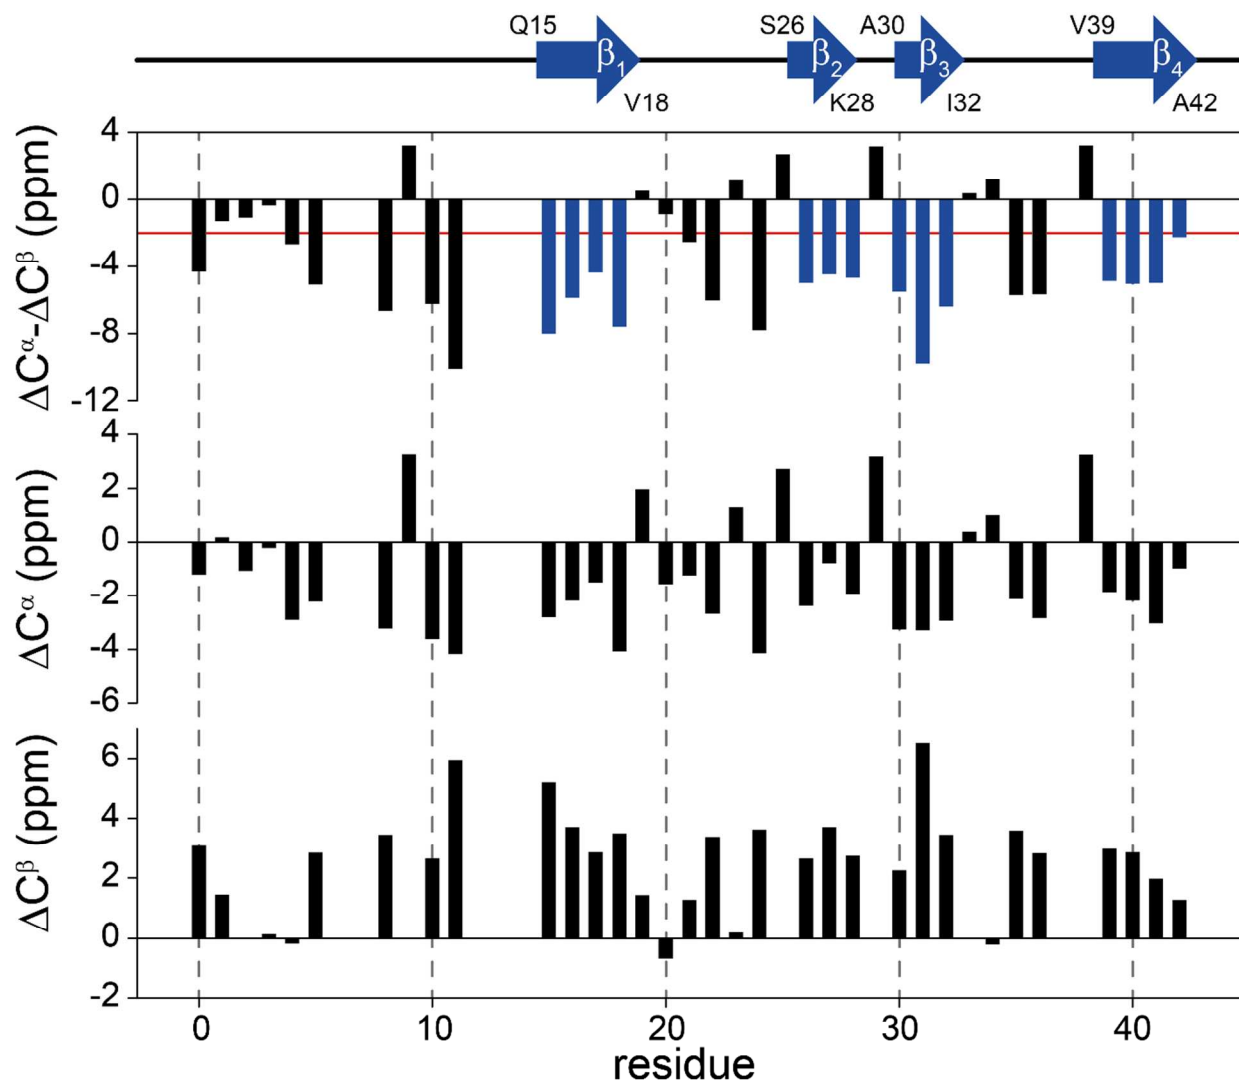

**Figure S6.** Secondary chemical shifts of  $C^\alpha$  and  $C^\beta$  sites of each residue. The upper plot shows the difference between the secondary chemical shifts of  $C^\alpha$  and  $C^\beta$  sites. Three or more consecutive sites where this difference is less than -2 (red line) indicate the presence of a  $\beta$ -strand. These bars are shown in blue.



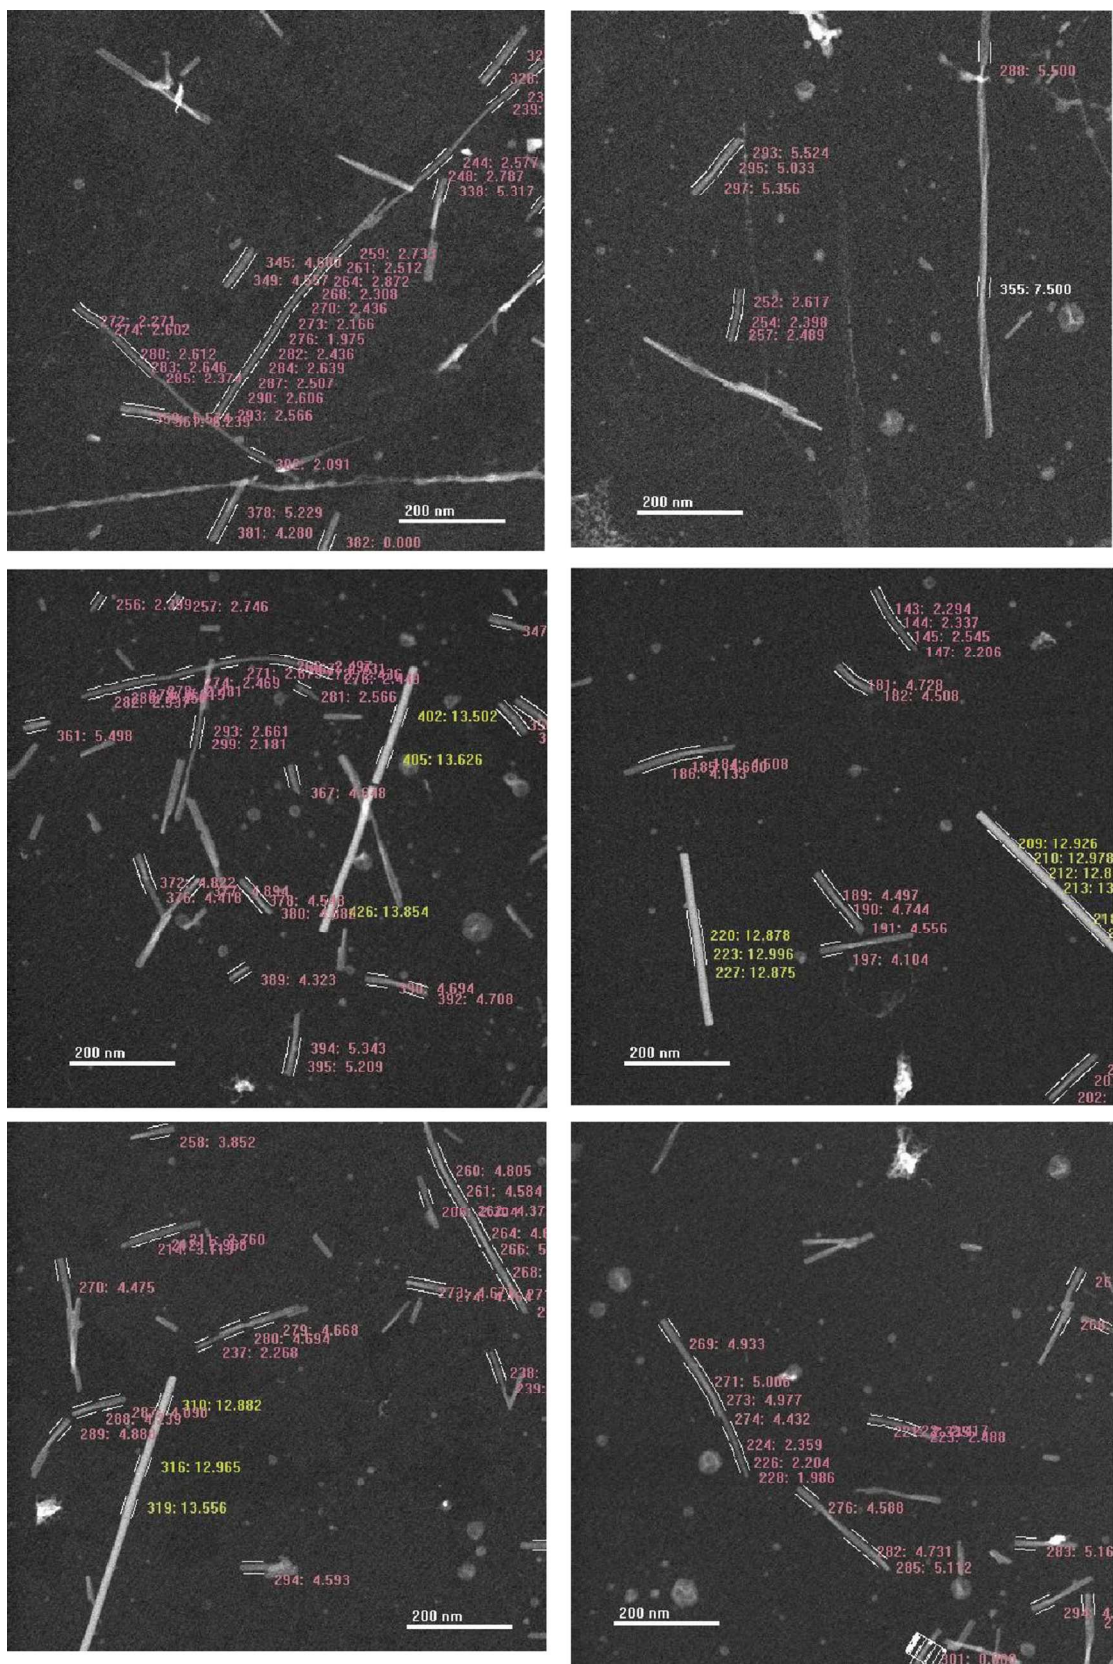

Figure S7. Additional micrographs from STEM

**A) SEQUENTIAL ( $|i-j|=1$ )**

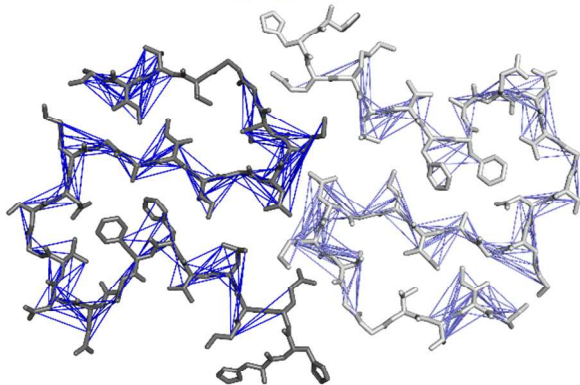

**B) MEDIUM RANGE ( $2 \leq |i-j| \leq 4$ )**

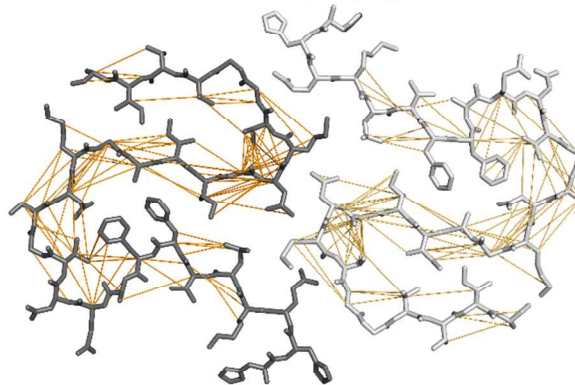

**C) LONG RANGE ( $|i-j| \geq 5$ )**

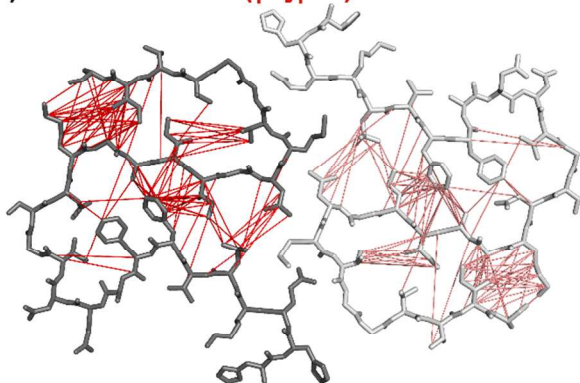

**D) INTERMOLECULAR**

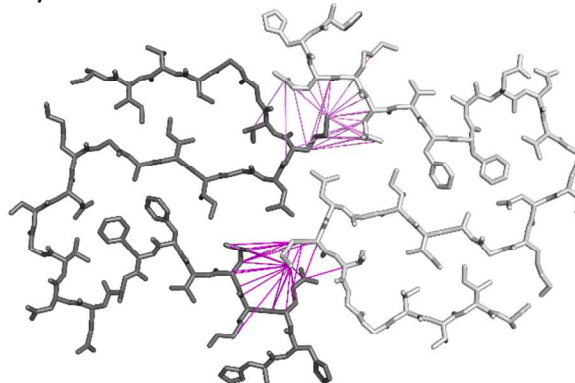

**Figure S8.** Constraints for structure calculation. Schematic representation of unique constraints used for structure calculation. A total of 487 unique distance constraints of which (A) 264 were sequential contacts, (B) 93 medium range, (C) 104 long range, and (D) 26 intermolecular distance constraints.



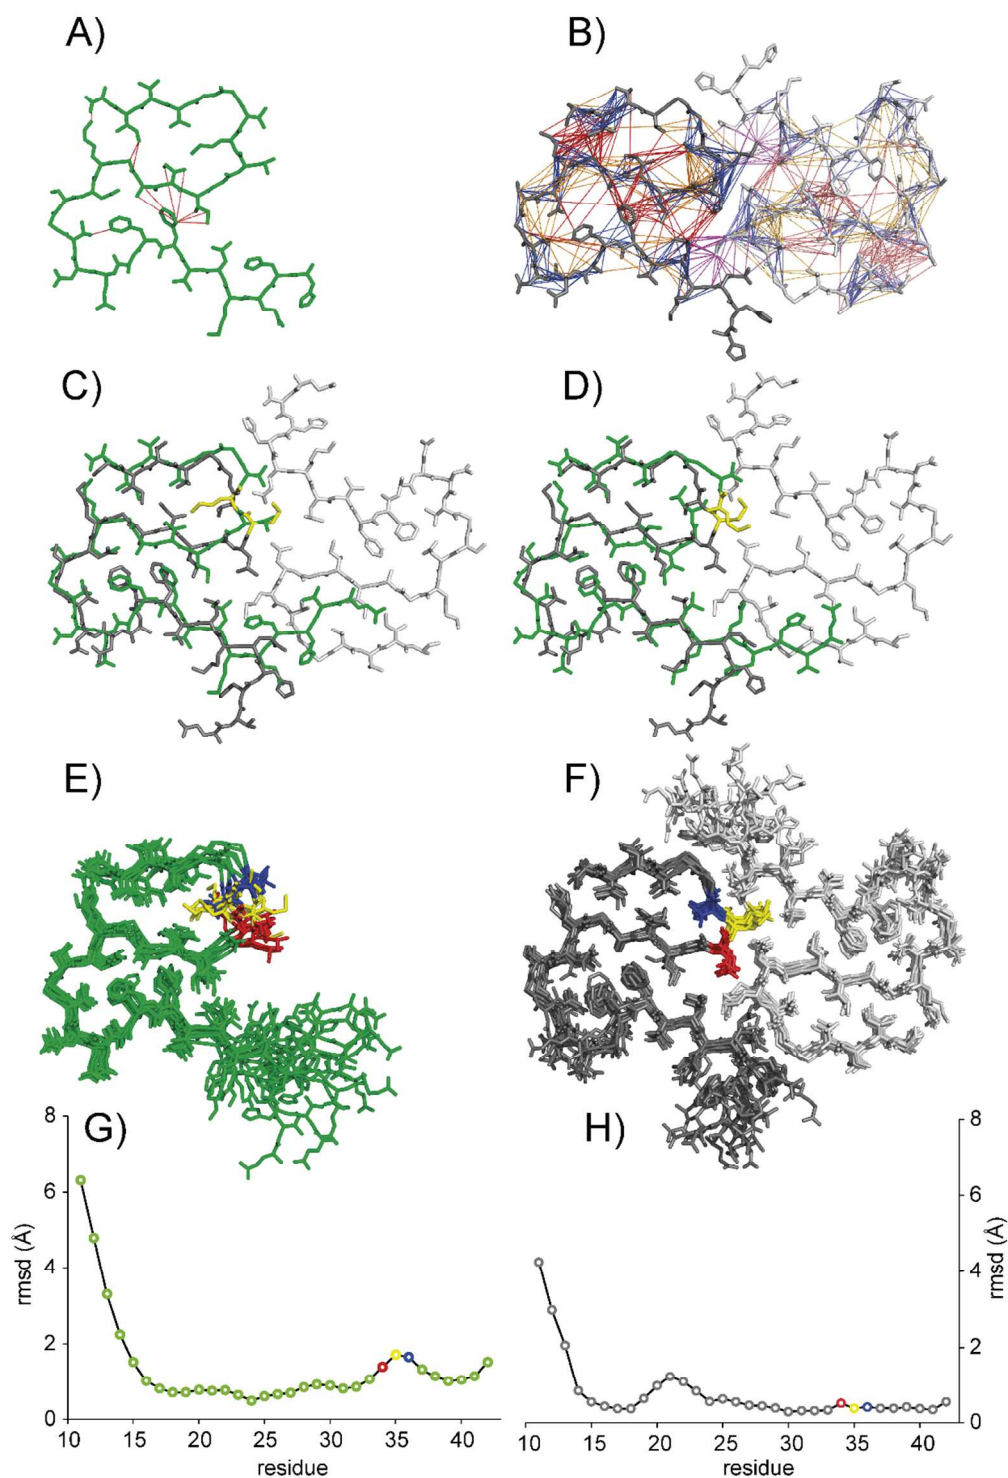

**Figure S9.** Comparison between the structural model proposed by Xiao et al. and the structure presented here. **(A)** Schematic representation of unique constraints used for structure calculation. A total of 38 unique distance constraints of which 11 were long range distance constraints. **(B)** Schematic representation of unique constraints used for structure calculation. A total of 487 unique distance constraints of which 264 were sequential contacts, 93 medium range, 104 long range, and 26 intermolecular distance constraints. **(C+D)** Alignment of chain F of Ishii's structural model with chain E of the structure presented here. The lowest **(C)** and second lowest **(D)** energy models of Ishii's structural model are compared to the lowest energy model of the structure presented here. **(E)** Bundle of the 10 lowest energy models of Ishii's structural model. **(F)** Bundle of the 10 lowest energy models of the structure presented here. Residue-wise RMSD is shown for Ishii's structural model **(G)** and the structure presented here **(H)**.

**TABLE S1 - Total number of picked intraresidual, sequential, medium range, long range, and intermolecular contacts.**

|                    | INTRA      | SEQUENTIAL | MEDIUM     | LONG       | INTER     |
|--------------------|------------|------------|------------|------------|-----------|
| 100%UCN-PAR-5ms    | 74         | 63         | 8          | 34         | 10        |
| 100%UCN-PAR-10ms   | 119        | 102        | 25         | 51         | 12        |
| 100%UCN-PAR-20ms   | 103        | 122        | 33         | 66         | 18        |
| 100%UCN-PAIN-30ms  | 38         | 35         | 26         | 15         | 1         |
| 100%UCN-DARR-25ms  | 129        | 36         | 1          | 5          | 0         |
| 30%UCN-DARR-100ms  | 146        | 121        | 4          | 10         | 0         |
| 30%UCN-PAR-20ms    | 125        | 74         | 7          | 30         | 0         |
| 1,6Glc-TEDOR-6.4ms | 26         | 10         | 1          | 0          | 0         |
| 1,6Glc-TEDOR-12ms  | 18         | 11         | 4          | 0          | 1         |
| 1,6Glc-DARR-100ms  | 41         | 1          | 2          | 2          | 0         |
| 2Gly-DARR-400ms    | 51         | 40         | 8          | 6          | 0         |
| FS-REDOR           | 0          | 0          | 0          | 1          | 0         |
| <hr/>              |            |            |            |            |           |
| <b>TOTAL</b>       | <b>870</b> | <b>615</b> | <b>119</b> | <b>220</b> | <b>42</b> |

**TABLE S2 Table of UNIQUE sequential, medium range, long range, and intermolecular contacts.**

A = 100%UCN-PAR-5ms - 8.5 Angstroms  
 B = 100%UCN-PAR-10ms - 8.5 Angstroms  
 C = 100%UCN-PAR-20ms - 10.0 Angstroms  
 D = 100%UCN-PAIN-30ms - 12.0 Angstroms  
 E = 100%UCN-DARR-25ms - 7.5 Angstroms  
 F = 30%UCN-DARR-100ms - 7.5 Angstroms  
 G = 30%UCN-PAR-20ms - 10.0 Angstroms  
 H = 1,6Glc-TEDOR-6.4ms - 6.5 Angstroms  
 I = 1,6Glc-TEDOR-12ms - 7.5 Angstroms  
 J = 1,6Glc-DARR-100ms - 7.5 Angstroms  
 K = 2Gly-DARR-400ms - 8.0 Angstroms  
 L = FS-REDOR - 4.7 Angstroms

(X = observed, # = count)  
 (Types (T): S=SEQ, M=MED, L=LONG, X=INTER)

| NUC1         | NUC2         | A        | B        | C        | D        | E | F | G | H | I | J | K | L | #        | T        | RESTRAINT   |
|--------------|--------------|----------|----------|----------|----------|---|---|---|---|---|---|---|---|----------|----------|-------------|
| <b>Q15CA</b> | <b>M35CE</b> | <b>X</b> | <b>X</b> | <b>X</b> | -        | - | - | - | - | - | - | - | - | <b>3</b> | <b>X</b> | <b>8.5</b>  |
| <b>Q15CB</b> | <b>M35CE</b> | <b>X</b> | <b>X</b> | <b>X</b> | -        | - | - | - | - | - | - | - | - | <b>3</b> | <b>X</b> | <b>8.5</b>  |
| <b>Q15CG</b> | <b>M35CE</b> | <b>X</b> | <b>X</b> | <b>X</b> | -        | - | - | - | - | - | - | - | - | <b>3</b> | <b>X</b> | <b>8.5</b>  |
| Q15CG        | K16CD        | -        | X        | X        | -        | - | - | - | - | - | - | - | - | 2        | S        | 8.5         |
| Q15CO        | K16CA        | -        | X        | -        | -        | - | - | - | - | - | - | - | - | 1        | S        | 8.5         |
| Q15CA        | K16CD        | -        | X        | -        | -        | - | - | - | - | - | - | - | - | 1        | S        | 8.5         |
| <b>Q15CG</b> | <b>M35CB</b> | -        | <b>X</b> | -        | -        | - | - | - | - | - | - | - | - | <b>1</b> | <b>X</b> | <b>8.5</b>  |
| <b>Q15CO</b> | <b>M35CB</b> | -        | <b>X</b> | -        | -        | - | - | - | - | - | - | - | - | <b>1</b> | <b>X</b> | <b>8.5</b>  |
| <b>Q15CO</b> | <b>M35CG</b> | -        | <b>X</b> | -        | -        | - | - | - | - | - | - | - | - | <b>1</b> | <b>X</b> | <b>8.5</b>  |
| <b>Q15CD</b> | <b>V36CB</b> | -        | <b>X</b> | -        | -        | - | - | - | - | - | - | - | - | <b>1</b> | <b>X</b> | <b>8.5</b>  |
| <b>Q15CD</b> | <b>M35CE</b> | -        | -        | <b>X</b> | -        | - | - | - | - | - | - | - | - | <b>1</b> | <b>X</b> | <b>10.0</b> |
| <b>Q15CO</b> | <b>M35CE</b> | -        | -        | <b>X</b> | -        | - | - | - | - | - | - | - | - | <b>1</b> | <b>X</b> | <b>10.0</b> |
| <b>Q15CD</b> | <b>M35N</b>  | -        | -        | -        | <b>X</b> | - | - | - | - | - | - | - | - | <b>1</b> | <b>X</b> | <b>12.0</b> |
| Q15CO        | K16CD        | -        | -        | -        | -        | X | - | - | - | - | - | - | - | 1        | S        | 7.5         |
| K16CO        | L17CA        | X        | -        | X        | -        | X | X | X | - | - | - | - | - | 5        | S        | 7.5         |
| K16CD        | L17CA        | -        | -        | X        | -        | - | - | - | - | - | - | - | - | 1        | S        | 10.0        |
| K16CO        | L17CD1       | -        | -        | X        | -        | - | X | - | - | - | - | - | - | 2        | S        | 7.5         |
| K16CO        | L17CB        | -        | -        | X        | -        | - | X | - | - | - | - | - | - | 2        | S        | 7.5         |
| K16CD        | L17CD2       | -        | -        | X        | -        | - | - | - | - | - | - | - | - | 1        | S        | 10.0        |
| K16CO        | L17CD2       | -        | -        | X        | -        | X | X | - | - | - | - | - | - | 3        | S        | 7.5         |
| K16CO        | L17CG        | -        | -        | X        | -        | - | X | - | - | - | - | X | - | 3        | S        | 7.5         |
| <b>K16CD</b> | <b>M35CE</b> | -        | -        | <b>X</b> | -        | - | - | - | - | - | - | - | - | <b>1</b> | <b>X</b> | <b>10.0</b> |
| <b>K16CO</b> | <b>M35CE</b> | -        | -        | <b>X</b> | -        | - | - | - | - | - | - | - | - | <b>1</b> | <b>X</b> | <b>10.0</b> |
| K16CG        | L17N         | -        | -        | -        | X        | - | - | - | - | - | - | - | - | 1        | S        | 12.0        |
| K16CO        | L17N         | -        | -        | -        | X        | - | - | - | - | - | - | - | - | 1        | S        | 12.0        |
| K16CB        | V18N         | -        | -        | -        | X        | - | - | - | - | - | - | - | - | 1        | M        | 12.0        |
| K16CO        | V18N         | -        | -        | -        | X        | - | - | - | - | - | - | - | - | 1        | M        | 12.0        |
| K16CO        | L17CO        | -        | -        | -        | -        | X | - | - | - | - | - | X | - | 2        | S        | 7.5         |
| K16CB        | L17CD2       | -        | -        | -        | -        | X | - | - | - | - | - | - | - | 1        | S        | 7.5         |
| K16CA        | V18CO        | -        | -        | -        | -        | - | - | X | - | - | - | - | - | 1        | M        | 10.0        |
| L17CG        | V18CA        | X        | X        | X        | -        | - | X | X | - | - | - | X | - | 6        | S        | 7.5         |

|               |              |          |          |          |          |          |          |          |          |          |          |          |          |          |          |             |
|---------------|--------------|----------|----------|----------|----------|----------|----------|----------|----------|----------|----------|----------|----------|----------|----------|-------------|
| L17CD1        | I32CD1       | X        | X        | X        | -        | -        | -        | X        | -        | -        | -        | -        | -        | 4        | L        | 8.5         |
| <b>L17CD2</b> | <b>M35CG</b> | <b>X</b> | <b>-</b> | <b>X</b> | <b>-</b> | <b>2</b> | <b>X</b> | <b>8.5</b>  |
| <b>L17CG</b>  | <b>M35CB</b> | <b>X</b> | <b>X</b> | <b>X</b> | <b>-</b> | <b>3</b> | <b>X</b> | <b>8.5</b>  |
| L17CA         | L34CG        | X        | X        | -        | -        | -        | -        | X        | -        | -        | -        | -        | -        | 3        | L        | 8.5         |
| <b>L17CB</b>  | <b>M35CB</b> | <b>X</b> | <b>-</b> | <b>1</b> | <b>X</b> | <b>8.5</b>  |
| <b>L17CB</b>  | <b>M35CE</b> | <b>X</b> | <b>X</b> | <b>X</b> | <b>-</b> | <b>3</b> | <b>X</b> | <b>8.5</b>  |
| <b>L17CD2</b> | <b>M35CE</b> | <b>X</b> | <b>X</b> | <b>X</b> | <b>-</b> | <b>3</b> | <b>X</b> | <b>8.5</b>  |
| <b>L17CG</b>  | <b>M35CE</b> | <b>X</b> | <b>X</b> | <b>X</b> | <b>-</b> | <b>3</b> | <b>X</b> | <b>8.5</b>  |
| <b>L17CB</b>  | <b>M35CG</b> | <b>X</b> | <b>-</b> | <b>1</b> | <b>X</b> | <b>8.5</b>  |
| L17CD2        | V18CA        | -        | X        | X        | -        | -        | -        | -        | -        | -        | -        | -        | -        | 2        | S        | 8.5         |
| L17CD1        | F19CA        | -        | X        | X        | -        | -        | -        | -        | -        | -        | -        | -        | -        | 2        | M        | 8.5         |
| <b>L17CD1</b> | <b>M35CE</b> | <b>-</b> | <b>X</b> | <b>X</b> | <b>-</b> | <b>2</b> | <b>X</b> | <b>8.5</b>  |
| L17CA         | V18CO        | -        | -        | X        | -        | -        | -        | -        | -        | -        | -        | -        | -        | 1        | S        | 10.0        |
| L17CB         | V18CA        | -        | -        | X        | -        | -        | X        | -        | -        | -        | -        | -        | -        | 2        | S        | 7.5         |
| L17CD1        | V18CA        | -        | -        | X        | -        | -        | -        | -        | -        | -        | -        | -        | -        | 1        | S        | 10.0        |
| L17CG         | V18CB        | -        | -        | X        | -        | -        | -        | -        | -        | -        | -        | X        | -        | 2        | S        | 8.0         |
| L17CD1        | F19CB        | -        | -        | X        | -        | -        | -        | -        | -        | -        | -        | -        | -        | 1        | M        | 10.0        |
| L17CD1        | L34CB        | -        | -        | X        | -        | -        | -        | -        | -        | -        | -        | -        | -        | 1        | L        | 10.0        |
| L17CD1        | L34CG        | -        | -        | X        | -        | -        | -        | -        | -        | -        | -        | -        | -        | 1        | L        | 10.0        |
| <b>L17CD1</b> | <b>M35CB</b> | <b>-</b> | <b>-</b> | <b>X</b> | <b>-</b> | <b>1</b> | <b>X</b> | <b>10.0</b> |
| <b>L17CD1</b> | <b>M35CG</b> | <b>-</b> | <b>-</b> | <b>X</b> | <b>-</b> | <b>1</b> | <b>X</b> | <b>10.0</b> |
| <b>L17CD2</b> | <b>M35CB</b> | <b>-</b> | <b>-</b> | <b>X</b> | <b>-</b> | <b>1</b> | <b>X</b> | <b>10.0</b> |
| L17CG         | I32CA        | -        | -        | X        | -        | -        | -        | -        | -        | -        | -        | -        | -        | 1        | L        | 10.0        |
| L17CD2        | I32CD1       | -        | -        | X        | -        | -        | -        | -        | -        | -        | -        | -        | -        | 1        | L        | 10.0        |
| L17CG         | L34CB        | -        | -        | X        | -        | -        | -        | -        | -        | -        | -        | -        | -        | 1        | L        | 10.0        |
| L17CG         | L34CG        | -        | -        | X        | -        | -        | -        | -        | -        | -        | -        | -        | -        | 1        | L        | 10.0        |
| <b>L17CA</b>  | <b>M35CE</b> | <b>-</b> | <b>-</b> | <b>X</b> | <b>-</b> | <b>1</b> | <b>X</b> | <b>10.0</b> |
| <b>L17CO</b>  | <b>M35CE</b> | <b>-</b> | <b>-</b> | <b>X</b> | <b>-</b> | <b>1</b> | <b>X</b> | <b>10.0</b> |
| L17CA         | V18N         | -        | -        | -        | X        | -        | -        | -        | X        | -        | -        | -        | -        | 2        | S        | 6.5         |
| L17CB         | L34N         | -        | -        | -        | X        | -        | -        | -        | -        | -        | -        | -        | -        | 1        | L        | 12.0        |
| L17CD1        | V18CB        | -        | -        | -        | -        | X        | -        | -        | -        | -        | -        | -        | -        | 1        | S        | 7.5         |
| L17CA         | V18CA        | -        | -        | -        | -        | -        | X        | -        | -        | -        | -        | -        | -        | 1        | S        | 7.5         |
| L17CD1        | V18CO        | -        | -        | -        | -        | -        | X        | -        | -        | -        | -        | -        | -        | 1        | S        | 7.5         |
| L17CA         | V18CG1       | -        | -        | -        | -        | -        | X        | -        | -        | -        | -        | -        | -        | 1        | S        | 7.5         |
| L17CB         | V18CG1       | -        | -        | -        | -        | -        | X        | -        | -        | -        | -        | -        | -        | 1        | S        | 7.5         |
| L17CD1        | I32CA        | -        | -        | -        | -        | -        | X        | X        | -        | -        | -        | -        | -        | 2        | L        | 7.5         |
| L17CD1        | V18N         | -        | -        | -        | -        | -        | -        | -        | X        | X        | -        | -        | -        | 2        | S        | 6.5         |
| L17CD1        | F19N         | -        | -        | -        | -        | -        | -        | -        | -        | X        | -        | -        | -        | 1        | M        | 7.5         |
| <b>L17N</b>   | <b>M35CE</b> | <b>-</b> | <b>X</b> | <b>-</b> | <b>-</b> | <b>-</b> | <b>1</b> | <b>X</b> | <b>7.5</b>  |
| L17CG         | F19CA        | -        | -        | -        | -        | -        | -        | -        | -        | -        | -        | X        | -        | 1        | M        | 8.0         |
| V18CB         | F19CD1       | -        | X        | -        | -        | -        | -        | -        | -        | -        | -        | -        | -        | 1        | S        | 8.5         |
| V18CB         | F20CA        | -        | X        | -        | -        | -        | -        | -        | -        | -        | -        | -        | -        | 1        | M        | 8.5         |
| V18CA         | A21CB        | -        | X        | -        | -        | -        | -        | -        | -        | -        | -        | -        | -        | 1        | M        | 8.5         |
| V18N          | L34CD2       | -        | -        | -        | X        | -        | -        | -        | -        | -        | -        | -        | -        | 1        | L        | 12.0        |
| V18CB         | I32CG1       | -        | -        | -        | -        | -        | -        | X        | -        | -        | -        | -        | -        | 1        | L        | 10.0        |
| V18CG1        | F19N         | -        | -        | -        | -        | -        | -        | -        | X        | X        | -        | -        | -        | 2        | S        | 6.5         |
| V18CA         | F19CO        | -        | -        | -        | -        | -        | -        | -        | -        | -        | -        | X        | -        | 1        | S        | 8.0         |
| V18CO         | F20CA        | -        | -        | -        | -        | -        | -        | -        | -        | -        | -        | X        | -        | 1        | M        | 8.0         |
| F19CA         | F20CG        | X        | -        | -        | -        | -        | -        | -        | -        | -        | -        | -        | -        | 1        | S        | 8.5         |
| F19CG         | F20CA        | X        | -        | -        | -        | -        | X        | -        | -        | -        | -        | X        | -        | 3        | S        | 7.5         |
| F19CE1        | F20CB        | X        | X        | -        | -        | -        | -        | X        | -        | -        | -        | -        | -        | 3        | S        | 8.5         |
| F19CD1        | A30CA        | X        | X        | X        | -        | -        | -        | -        | -        | -        | -        | -        | -        | 3        | L        | 8.5         |
| F19CE1        | A30CA        | X        | X        | X        | -        | -        | -        | X        | -        | -        | -        | X        | -        | 5        | L        | 8.0         |
| F19CZ         | A30CA        | X        | X        | X        | -        | -        | -        | -        | -        | -        | -        | -        | -        | 3        | L        | 8.5         |

|        |        |   |   |   |   |   |   |   |   |   |   |   |   |   |      |
|--------|--------|---|---|---|---|---|---|---|---|---|---|---|---|---|------|
| F19CZ  | A30CB  | X | X | X | - | X | - | X | - | - | - | - | 5 | L | 7.5  |
| F19CZ  | I31CA  | X | - | - | - | - | - | - | - | - | - | - | 1 | L | 8.5  |
| F19CZ  | I31CB  | X | X | X | - | - | - | - | - | - | - | - | 3 | L | 8.5  |
| F19CZ  | I32CB  | X | X | - | - | - | - | - | - | - | - | - | 2 | L | 8.5  |
| F19CD1 | I32CD1 | X | X | X | - | - | X | X | - | - | - | - | 5 | L | 7.5  |
| F19CE1 | I32CD1 | X | X | X | - | - | X | X | - | - | - | X | 6 | L | 7.5  |
| F19CZ  | I32CD1 | X | X | - | - | - | - | - | - | - | - | - | 2 | L | 8.5  |
| F19CD1 | I32CG1 | X | X | X | - | - | X | X | - | - | X | - | 6 | L | 7.5  |
| F19CE1 | I32CG1 | X | X | X | - | - | X | X | - | - | - | - | 5 | L | 7.5  |
| F19CZ  | I32CG1 | X | X | X | - | - | - | X | - | - | - | - | 4 | L | 8.5  |
| F19CD1 | I32CG2 | X | X | X | - | - | - | X | - | - | - | - | 4 | L | 8.5  |
| F19CE1 | I32CG2 | X | X | - | - | - | - | X | - | - | - | - | 3 | L | 8.5  |
| F19CZ  | I32CG2 | X | X | X | - | - | - | - | - | - | - | - | 3 | L | 8.5  |
| F19CA  | F20CA  | - | X | X | - | - | - | - | - | - | - | - | 2 | S | 8.5  |
| F19CG  | F20CG  | - | X | - | - | - | - | - | - | - | - | - | 1 | S | 8.5  |
| F19CD1 | F20CA  | - | X | - | - | - | - | - | - | - | - | - | 1 | S | 8.5  |
| F19CO  | F20CA  | - | X | X | - | X | - | - | - | - | - | - | 3 | S | 7.5  |
| F19CB  | A30CA  | - | X | - | - | - | - | - | - | - | - | - | 1 | L | 8.5  |
| F19CD1 | A30CB  | - | X | X | - | - | X | - | - | - | X | - | 4 | L | 7.5  |
| F19CE1 | A30CB  | - | X | X | - | X | X | - | - | - | - | - | 4 | L | 7.5  |
| F19CE1 | I31CB  | - | X | X | - | - | - | - | - | - | - | - | 2 | L | 8.5  |
| F19CD1 | I32CA  | - | X | X | - | - | - | - | - | - | - | - | 2 | L | 8.5  |
| F19CE1 | I32CA  | - | X | X | - | - | - | - | - | - | - | - | 2 | L | 8.5  |
| F19CZ  | I32CA  | - | X | - | - | - | - | - | - | - | - | - | 1 | L | 8.5  |
| F19CD1 | I32CB  | - | X | X | - | X | - | - | - | - | - | - | 3 | L | 7.5  |
| F19CE1 | I32CB  | - | X | X | - | - | - | - | - | - | - | X | 3 | L | 8.0  |
| F19CB  | I31CO  | - | - | X | - | - | - | - | - | - | - | - | 1 | L | 10.0 |
| F19CD1 | I31CB  | - | - | X | - | - | - | - | - | - | - | - | 1 | L | 10.0 |
| F19CE1 | I31CG2 | - | - | X | - | - | - | - | - | - | - | - | 1 | L | 10.0 |
| F19CA  | F20N   | - | - | - | X | - | - | - | - | - | - | - | 1 | S | 12.0 |
| F19CB  | F20N   | - | - | - | X | - | - | - | - | - | - | - | 1 | S | 12.0 |
| F19CZ  | N27CB  | - | - | - | X | - | - | - | - | - | - | - | 1 | L | 12.0 |
| F19N   | I32CO  | - | - | - | X | - | - | - | - | - | - | - | 1 | L | 12.0 |
| F19CZ  | A30N   | - | - | - | X | - | - | - | - | - | - | - | 1 | L | 12.0 |
| F19CB  | I32N   | - | - | - | X | - | - | - | - | - | - | - | 1 | L | 12.0 |
| F19CD1 | I32N   | - | - | - | X | - | - | - | - | - | - | - | 1 | L | 12.0 |
| F19CB  | F20CA  | - | - | - | - | X | - | - | - | - | - | - | 1 | S | 7.5  |
| F19CG  | I32CB  | - | - | - | - | X | - | - | - | - | - | - | 1 | L | 7.5  |
| F20CA  | V24CG2 | X | X | X | - | - | - | - | - | - | - | - | 3 | M | 8.5  |
| F20CE1 | V24CG2 | X | - | - | - | - | - | - | - | - | - | - | 1 | M | 8.5  |
| F20CZ  | V24CG2 | X | - | - | - | - | - | - | - | - | - | - | 1 | M | 8.5  |
| F20CZ  | N27CA  | X | - | - | - | - | - | - | - | - | - | - | 1 | L | 8.5  |
| F20CZ  | N27CB  | X | - | - | - | - | - | - | - | - | - | - | 1 | L | 8.5  |
| F20CZ  | A30CB  | X | X | X | - | - | - | - | - | - | - | - | 3 | L | 8.5  |
| F20CD1 | V24CG2 | - | X | - | - | - | - | - | - | - | X | - | 2 | M | 7.5  |
| F20CA  | A21CA  | - | - | X | - | - | X | - | - | - | - | - | 2 | S | 7.5  |
| F20CB  | E22CA  | - | - | X | - | - | - | - | - | - | - | - | 1 | M | 10.0 |
| F20CA  | V24CB  | - | - | X | - | - | - | - | - | - | - | - | 1 | M | 10.0 |
| F20CA  | A21N   | - | - | - | X | - | - | - | - | - | - | - | 1 | S | 12.0 |
| F20CD1 | E22CA  | - | - | - | X | - | - | - | - | - | - | - | 1 | M | 12.0 |
| F20CA  | E22N   | - | - | - | X | - | - | - | - | - | - | - | 1 | M | 12.0 |
| F20CA  | G25N   | - | - | - | X | - | - | - | - | - | - | - | 1 | L | 12.0 |
| F20CO  | G25N   | - | - | - | X | - | - | - | - | - | - | - | 1 | L | 12.0 |
| F20CO  | A21CA  | - | - | - | - | X | - | - | - | - | - | - | 1 | S | 7.5  |

|        |        |   |   |   |   |   |   |   |   |   |   |   |   |   |   |      |
|--------|--------|---|---|---|---|---|---|---|---|---|---|---|---|---|---|------|
| F20CA  | A21CO  | - | - | - | - | - | X | - | - | - | - | - | - | 1 | S | 7.5  |
| F20CA  | A21CB  | - | - | - | - | - | X | - | - | - | - | - | - | 1 | S | 7.5  |
| A21CA  | E22CB  | - | X | - | - | - | X | - | - | - | - | - | - | 2 | S | 7.5  |
| A21CA  | V24CG2 | - | X | - | - | - | - | - | - | - | - | - | - | 1 | M | 8.5  |
| A21CB  | E22N   | - | - | - | X | - | - | - | - | - | - | - | - | 1 | S | 12.0 |
| A21CB  | E22CB  | - | - | - | - | - | X | - | - | - | - | - | - | 1 | S | 7.5  |
| A21CB  | E22CO  | - | - | - | - | - | X | - | - | - | - | - | - | 1 | S | 7.5  |
| A21CO  | E22CD  | - | - | - | - | - | X | - | - | - | - | - | - | 1 | S | 7.5  |
| A21CO  | E22CA  | - | - | - | - | - | X | - | - | - | - | - | - | 1 | S | 7.5  |
| A21CO  | E22CB  | - | - | - | - | - | X | - | - | - | - | - | - | 1 | S | 7.5  |
| A21CA  | E22CD  | - | - | - | - | - | - | - | - | - | X | - | - | 1 | S | 8.0  |
| E22CA  | V24CG1 | X | - | - | - | - | - | X | - | - | - | - | - | 2 | M | 8.5  |
| E22CA  | V24CA  | - | X | X | - | - | - | X | - | - | - | - | - | 3 | M | 8.5  |
| E22CG  | D23CG  | - | - | - | - | X | - | - | - | - | - | - | - | 1 | S | 7.5  |
| E22CA  | D23CA  | - | - | - | - | - | X | - | - | - | - | - | - | 1 | S | 7.5  |
| E22CA  | D23CG  | - | - | - | - | - | X | - | - | - | - | - | - | 1 | S | 7.5  |
| E22CA  | D23CO  | - | - | - | - | - | X | - | - | - | X | - | - | 2 | S | 7.5  |
| E22CB  | D23CA  | - | - | - | - | - | X | - | - | - | - | - | - | 1 | S | 7.5  |
| E22CB  | D23CO  | - | - | - | - | - | X | X | - | - | - | X | - | 3 | S | 7.5  |
| E22CG  | D23CO  | - | - | - | - | - | X | - | - | - | - | - | - | 1 | S | 7.5  |
| E22CO  | D23CA  | - | - | - | - | - | X | - | - | - | - | - | - | 1 | S | 7.5  |
| E22CB  | D23CB  | - | - | - | - | - | - | X | - | - | - | - | - | 1 | S | 10.0 |
| E22CO  | D23CG  | - | - | - | - | - | - | X | - | - | - | X | - | 2 | S | 8.0  |
| E22CA  | D23N   | - | - | - | - | - | - | - | X | - | - | - | - | 1 | S | 6.5  |
| E22CB  | D23N   | - | - | - | - | - | - | - | - | X | - | - | - | 1 | S | 7.5  |
| D23CB  | V24CG2 | - | X | - | - | - | - | - | - | - | - | - | - | 1 | S | 8.5  |
| D23N   | V24CB  | - | - | - | X | - | - | - | - | - | - | - | - | 1 | S | 12.0 |
| D23N   | G25CA  | - | - | - | X | - | - | - | - | - | - | - | - | 1 | M | 12.0 |
| D23CA  | V24CA  | - | - | - | - | - | X | X | - | - | - | X | - | 3 | S | 7.5  |
| D23CA  | V24CO  | - | - | - | - | - | X | - | - | - | - | - | - | 1 | S | 7.5  |
| D23CB  | V24CO  | - | - | - | - | - | X | - | - | - | - | - | - | 1 | S | 7.5  |
| D23CG  | V24CA  | - | - | - | - | - | X | - | - | - | - | - | - | 1 | S | 7.5  |
| D23CO  | V24CG2 | - | - | - | - | - | X | - | - | - | - | - | - | 1 | S | 7.5  |
| D23CB  | V24CA  | - | - | - | - | - | - | X | - | - | - | - | - | 1 | S | 10.0 |
| D23N   | V24CG2 | - | - | - | - | - | - | - | - | X | - | - | - | 1 | S | 7.5  |
| D23CO  | V24CA  | - | - | - | - | - | - | - | - | - | - | X | - | 1 | S | 8.0  |
| D23CO  | V24CB  | - | - | - | - | - | - | - | - | - | - | X | - | 1 | S | 8.0  |
| V24CA  | G25CA  | X | X | - | - | - | X | X | - | - | - | - | - | 4 | S | 7.5  |
| V24CO  | G25CA  | X | X | - | - | X | X | - | - | - | - | - | - | 4 | S | 7.5  |
| V24CG1 | G25CA  | - | X | - | - | - | - | - | - | - | - | - | - | 1 | S | 8.5  |
| V24CA  | S26CB  | - | X | X | - | - | - | - | - | - | - | - | - | 2 | M | 8.5  |
| V24CO  | N27CA  | - | X | - | - | - | - | - | - | - | - | - | - | 1 | M | 8.5  |
| V24CB  | S26CB  | - | - | X | - | - | - | - | - | - | - | - | - | 1 | M | 10.0 |
| V24CG2 | N27CB  | - | - | X | - | - | - | - | - | - | - | - | - | 1 | M | 10.0 |
| V24CA  | S26CA  | - | - | X | - | - | - | - | - | - | - | - | - | 1 | M | 10.0 |
| V24CO  | G25N   | - | - | - | X | - | - | - | - | - | - | - | - | 1 | S | 12.0 |
| V24CB  | K28N   | - | - | - | X | - | - | - | - | - | - | - | - | 1 | M | 12.0 |
| V24CG2 | A30N   | - | - | - | X | - | - | - | - | - | - | - | - | 1 | L | 12.0 |
| V24CO  | G25CO  | - | - | - | - | X | - | - | - | - | - | - | - | 1 | S | 7.5  |
| V24CB  | S26CO  | - | - | - | - | - | - | X | - | - | - | - | - | 1 | M | 10.0 |
| V24CG1 | S26N   | - | - | - | - | - | - | - | - | X | - | - | - | 1 | M | 7.5  |
| V24CB  | G25CA  | - | - | - | - | - | - | - | - | - | - | X | - | 1 | S | 8.0  |
| G25CA  | S26CA  | X | X | X | - | - | X | X | - | - | - | X | - | 6 | S | 7.5  |
| G25CA  | S26CB  | X | X | X | - | - | X | X | - | - | - | - | - | 5 | S | 7.5  |



|       |        |   |   |   |   |   |   |   |   |   |   |   |   |   |      |
|-------|--------|---|---|---|---|---|---|---|---|---|---|---|---|---|------|
| G25CO | S26CA  | - | X | - | - | - | - | - | - | - | - | - | 1 | S | 8.5  |
| G25CO | S26CB  | - | - | X | - | - | X | - | - | - | - | - | 2 | S | 7.5  |
| S26CB | N27CA  | X | X | X | - | - | X | X | - | - | - | - | 5 | S | 7.5  |
| S26CO | N27CA  | X | X | - | - | X | X | - | - | - | - | - | 4 | S | 7.5  |
| S26CB | N27CB  | X | X | X | - | - | X | X | - | - | - | - | 5 | S | 7.5  |
| S26CA | N27CA  | - | X | X | - | - | - | X | - | - | - | - | 3 | S | 8.5  |
| S26CA | N27CB  | - | X | X | - | - | - | - | - | - | - | - | 2 | S | 8.5  |
| S26CB | K28CB  | - | X | X | - | - | - | - | - | - | - | - | 2 | M | 8.5  |
| S26CA | N27CO  | - | - | X | - | - | X | - | - | - | - | - | 2 | S | 7.5  |
| S26CB | K28CA  | - | - | X | - | - | - | - | - | - | - | - | 1 | M | 10.0 |
| S26CO | G29CA  | - | - | X | - | - | - | - | - | - | - | - | 1 | M | 10.0 |
| S26CB | N27N   | - | - | - | X | - | - | - | - | X | - | - | 2 | S | 7.5  |
| S26N  | K28CB  | - | - | - | X | - | - | - | - | - | - | - | 1 | M | 12.0 |
| S26CA | G29N   | - | - | - | X | - | - | - | - | - | - | - | 1 | M | 12.0 |
| S26CB | N27CO  | - | - | - | - | X | - | - | - | - | - | - | 1 | S | 7.5  |
| S26CO | N27CB  | - | - | - | - | - | X | - | - | - | - | - | 1 | S | 7.5  |
| N27CA | K28CA  | X | X | X | - | - | X | X | - | - | - | - | 5 | S | 7.5  |
| N27CA | K28CB  | X | X | X | - | - | X | X | - | - | - | - | 5 | S | 7.5  |
| N27CA | K28CD  | X | X | X | - | - | - | X | - | - | - | - | 4 | S | 8.5  |
| N27CA | K28CG  | X | X | X | - | - | - | - | - | - | - | - | 3 | S | 8.5  |
| N27CO | K28CB  | - | X | - | - | - | X | - | - | - | - | - | 2 | S | 7.5  |
| N27CO | K28CD  | - | X | X | - | - | - | - | - | - | X | - | 3 | S | 8.0  |
| N27CA | G29CA  | - | X | X | - | - | X | - | - | - | - | - | 3 | M | 7.5  |
| N27CB | G29CA  | - | X | - | - | - | - | - | - | - | - | - | 1 | M | 8.5  |
| N27CB | K28CB  | - | - | X | - | - | X | - | - | - | - | - | 2 | S | 7.5  |
| N27CO | K28CG  | - | - | X | - | - | - | - | - | - | - | - | 1 | S | 10.0 |
| N27CA | A30CA  | - | - | X | - | - | - | - | - | - | - | - | 1 | M | 10.0 |
| N27N  | K28CA  | - | - | - | X | - | - | - | - | - | - | - | 1 | S | 12.0 |
| N27CA | G29N   | - | - | - | X | - | - | - | - | - | - | - | 1 | M | 12.0 |
| N27CA | A30N   | - | - | - | X | - | - | - | - | - | - | - | 1 | M | 12.0 |
| N27CO | A42N   | - | - | - | X | - | - | - | - | - | - | - | 1 | L | 12.0 |
| N27CA | K28CO  | - | - | - | - | - | X | - | - | - | - | - | 1 | S | 7.5  |
| N27CB | K28CA  | - | - | - | - | - | X | - | - | - | X | - | 2 | S | 7.5  |
| N27CB | K28CO  | - | - | - | - | - | X | - | - | - | - | - | 1 | S | 7.5  |
| N27CO | K28CA  | - | - | - | - | - | - | X | - | - | X | - | 2 | S | 8.0  |
| N27CO | G29CA  | - | - | - | - | - | - | - | - | - | X | - | 1 | M | 8.0  |
| K28CB | G29CA  | X | X | X | - | - | X | X | - | - | - | - | 5 | S | 7.5  |
| K28CD | G29CA  | X | X | X | - | - | - | X | - | - | - | - | 4 | S | 8.5  |
| K28CE | G29CA  | X | X | X | - | - | - | - | - | - | - | - | 3 | S | 8.5  |
| K28CG | G29CA  | X | X | X | - | - | - | - | - | - | - | - | 3 | S | 8.5  |
| K28CA | G29CA  | X | X | X | - | - | X | X | - | - | X | - | 6 | S | 7.5  |
| K28CO | G29CA  | X | X | X | - | X | X | X | - | - | X | - | 7 | S | 7.5  |
| K28CG | I41CB  | X | X | X | - | - | - | - | - | - | - | - | 3 | L | 8.5  |
| K28CB | I41CD1 | X | X | X | - | - | - | - | - | - | - | - | 3 | L | 8.5  |
| K28CD | I41CG2 | X | X | X | - | - | - | X | - | - | - | - | 4 | L | 8.5  |
| K28CG | I41CG2 | X | X | - | - | - | - | X | - | - | - | - | 3 | L | 8.5  |
| K28CA | G29CO  | - | X | X | - | - | X | - | - | - | - | - | 3 | S | 7.5  |
| K28CB | A30CA  | - | X | X | - | - | - | - | - | - | - | - | 2 | M | 8.5  |
| K28CA | A30CA  | - | X | X | - | - | - | - | - | - | - | - | 2 | M | 8.5  |
| K28CA | I41CB  | - | X | - | - | - | - | - | - | - | - | - | 1 | L | 8.5  |
| K28CD | I41CB  | - | X | X | - | - | - | - | - | - | - | - | 2 | L | 8.5  |
| K28CE | I41CB  | - | X | X | - | - | - | - | - | - | - | - | 2 | L | 8.5  |
| K28CG | I41CA  | - | X | X | - | - | - | - | - | - | - | - | 2 | L | 8.5  |
| K28CA | I41CD1 | - | X | - | - | - | - | - | - | - | - | - | 1 | L | 8.5  |

|       |        |   |   |   |   |   |   |   |   |   |   |   |   |   |      |      |
|-------|--------|---|---|---|---|---|---|---|---|---|---|---|---|---|------|------|
| K28CG | I41CD1 | - | X | X | - | - | - | - | - | - | - | - | 2 | L | 8.5  |      |
| K28CA | I41CG2 | - | X | X | - | - | - | - | - | - | - | - | 2 | L | 8.5  |      |
| K28CB | I41CG2 | - | X | - | - | - | - | - | - | - | - | - | 1 | L | 8.5  |      |
| K28CE | I41CG2 | - | X | X | - | - | - | - | - | - | - | - | 2 | L | 8.5  |      |
| K28CB | G29CO  | - | - | X | - | - | X | - | - | - | - | - | 2 | S | 7.5  |      |
| K28CD | G29CO  | - | - | X | - | - | - | - | - | - | - | - | 1 | S | 10.0 |      |
| K28CE | G29CO  | - | - | X | - | - | - | - | - | - | - | - | 1 | S | 10.0 |      |
| K28CG | G29CO  | - | - | X | - | - | - | - | - | - | - | - | 1 | S | 10.0 |      |
| K28CB | I41CB  | - | - | X | - | - | - | - | - | - | - | - | 1 | L | 10.0 |      |
| K28CD | I41CA  | - | - | X | - | - | - | - | - | - | - | - | 1 | L | 10.0 |      |
| K28CE | I41CA  | - | - | X | - | - | - | X | - | - | - | - | 2 | L | 10.0 |      |
| K28CE | I41CO  | - | - | X | - | - | - | - | - | - | - | - | 1 | L | 10.0 |      |
| K28CD | I41CD1 | - | - | X | - | - | - | - | - | - | - | - | 1 | L | 10.0 |      |
| K28CE | I41CD1 | - | - | X | - | - | - | - | - | - | - | - | 1 | L | 10.0 |      |
| K28CD | I41CG1 | - | - | X | - | - | - | - | - | - | - | - | 1 | L | 10.0 |      |
| K28CA | G29N   | - | - | - | X | - | - | - | - | - | - | - | 1 | S | 12.0 |      |
| K28CE | A30N   | - | - | - | X | - | - | - | - | - | - | - | 1 | M | 12.0 |      |
| K28CB | I41N   | - | - | - | X | - | - | - | - | - | - | - | 1 | L | 12.0 |      |
| K28CO | G29CO  | - | - | - | - | X | - | - | - | - | - | - | 1 | S | 7.5  |      |
| K28CB | A42CO  | - | - | - | - | X | - | - | - | - | - | - | 1 | L | 7.5  |      |
| K28CG | I41CO  | - | - | - | - | - | - | - | - | - | X | - | 1 | L | 8.0  |      |
| K28NZ | A42CO  | - | - | - | - | - | - | - | - | - | - | X | 1 | L | 4.7  |      |
| G29CA | A30CA  | X | X | X | - | X | X | X | - | - | - | X | - | 7 | S    | 7.5  |
| G29CO | A30CA  | X | X | X | - | X | X | X | - | - | - | X | - | 7 | S    | 7.5  |
| G29CA | A30CB  | X | X | X | - | - | X | X | - | - | - | - | - | 5 | S    | 7.5  |
| G29CO | A30CB  | X | X | X | - | - | X | X | - | - | - | - | - | 5 | S    | 7.5  |
| G29CO | I31CG2 | X | - | - | - | - | - | X | - | - | - | - | - | 2 | M    | 8.5  |
| G29CA | I41CA  | X | X | X | - | - | - | X | - | - | - | - | - | 4 | L    | 8.5  |
| G29CA | I41CB  | X | X | X | - | - | - | X | - | - | - | - | - | 4 | L    | 8.5  |
| G29CA | I41CD1 | X | X | X | - | - | - | X | - | - | - | X | - | 5 | L    | 8.0  |
| G29CO | I41CD1 | X | X | X | - | - | - | X | - | - | - | - | - | 4 | L    | 8.5  |
| G29CA | I41CG1 | X | X | - | - | - | - | X | - | - | - | - | - | 3 | L    | 8.5  |
| G29CO | I41CG1 | X | - | - | - | - | - | X | - | - | - | - | - | 2 | L    | 8.5  |
| G29CA | I41CG2 | X | X | X | - | - | - | X | - | - | - | - | - | 4 | L    | 8.5  |
| G29CA | I31CB  | - | X | X | - | - | X | - | - | - | - | - | - | 3 | M    | 7.5  |
| G29CO | I31CG1 | - | X | X | - | - | - | - | - | - | - | - | - | 2 | M    | 8.5  |
| G29CO | I41CG2 | - | X | X | - | - | - | - | - | - | - | - | - | 2 | L    | 8.5  |
| G29CO | A30CO  | - | - | X | - | - | - | - | - | - | - | - | - | 1 | S    | 10.0 |
| G29CO | I31CB  | - | - | X | - | - | - | - | - | - | - | - | - | 1 | M    | 10.0 |
| G29CA | I31CG1 | - | - | X | - | - | - | - | - | - | - | - | - | 1 | M    | 10.0 |
| G29CO | I41CA  | - | - | X | - | - | - | - | - | - | - | - | - | 1 | L    | 10.0 |
| G29CO | I41CB  | - | - | X | - | - | - | - | - | - | - | - | - | 1 | L    | 10.0 |
| G29CA | A42CB  | - | - | X | - | - | X | X | - | - | - | - | - | 3 | L    | 7.5  |
| G29N  | A30CA  | - | - | - | X | - | - | - | - | - | - | - | - | 1 | S    | 12.0 |
| G29CA | A30N   | - | - | - | X | - | - | - | - | - | - | - | - | 1 | S    | 12.0 |
| G29CA | I41N   | - | - | - | X | - | - | - | - | - | - | - | - | 1 | L    | 12.0 |
| G29CA | I31CA  | - | - | - | - | - | X | - | - | - | - | - | - | 1 | M    | 7.5  |
| G29CA | A42CA  | - | - | - | - | - | - | X | - | - | - | - | - | 1 | L    | 10.0 |
| A30CA | I31CA  | X | X | X | - | X | X | X | - | - | - | - | - | 6 | S    | 7.5  |
| A30CB | I31CB  | X | X | X | - | - | X | X | - | - | - | - | - | 5 | S    | 7.5  |
| A30CA | I31CB  | X | X | X | - | - | X | X | - | - | - | X | - | 6 | S    | 7.5  |
| A30CA | I31CD1 | X | X | X | - | - | X | X | - | - | - | - | - | 5 | S    | 7.5  |
| A30CO | I31CD1 | X | X | X | - | - | X | X | - | - | - | - | - | 5 | S    | 7.5  |
| A30CA | I31CG1 | X | X | X | - | - | X | X | - | - | - | - | - | 5 | S    | 7.5  |

|        |        |   |   |   |   |   |   |   |   |   |   |   |   |   |   |      |
|--------|--------|---|---|---|---|---|---|---|---|---|---|---|---|---|---|------|
| A30CO  | I31CG1 | X | X | X | - | X | X | X | - | - | - | - | - | 6 | S | 7.5  |
| A30CA  | I31CG2 | X | X | X | - | - | X | X | - | - | - | - | - | 5 | S | 7.5  |
| A30CO  | I31CG2 | X | X | X | - | - | X | X | - | - | - | - | - | 5 | S | 7.5  |
| A30CO  | I31CA  | - | X | X | - | X | X | X | - | - | - | - | - | 5 | S | 7.5  |
| A30CO  | I31CB  | - | X | X | - | X | X | - | - | - | - | - | - | 4 | S | 7.5  |
| A30CA  | I31CO  | - | - | X | - | - | X | - | - | - | - | X | - | 3 | S | 7.5  |
| A30CA  | I32CB  | - | - | X | - | - | - | - | - | - | - | - | - | 1 | M | 10.0 |
| A30CA  | I31N   | - | - | - | X | - | - | - | - | - | - | - | - | 1 | S | 12.0 |
| A30CB  | I31N   | - | - | - | X | - | - | - | - | X | - | - | - | 2 | S | 7.5  |
| A30CO  | I31N   | - | - | - | X | - | - | - | - | - | - | - | - | 1 | S | 12.0 |
| A30N   | I32CG2 | - | - | - | X | - | - | - | - | - | - | - | - | 1 | M | 12.0 |
| A30N   | G33CA  | - | - | - | X | - | - | - | - | - | - | - | - | 1 | M | 12.0 |
| A30N   | V40CG1 | - | - | - | X | - | - | - | - | - | - | - | - | 1 | L | 12.0 |
| A30CO  | I31CO  | - | - | - | - | X | - | X | - | - | - | - | - | 2 | S | 7.5  |
| A30CB  | I31CO  | - | - | - | - | - | - | X | - | - | - | - | - | 1 | S | 10.0 |
| I31CB  | I32CB  | X | X | X | - | - | - | - | - | - | - | X | - | 4 | S | 8.0  |
| I31CG1 | V36CB  | X | X | X | - | - | X | X | - | - | - | - | - | 5 | L | 7.5  |
| I31CB  | V36CB  | X | X | X | - | - | - | - | - | - | - | - | - | 3 | L | 8.5  |
| I31CO  | I32CB  | - | X | - | - | - | X | - | - | - | - | X | - | 3 | S | 7.5  |
| I31CO  | I32CD1 | - | X | X | - | - | - | - | - | - | - | - | - | 2 | S | 8.5  |
| I31CO  | I32CG1 | - | X | - | - | - | - | - | - | - | - | - | - | 1 | S | 8.5  |
| I31CG2 | G33CA  | - | X | - | - | - | - | - | - | - | - | - | - | 1 | M | 8.5  |
| I31CD1 | V36CG2 | - | X | X | - | - | - | - | - | - | - | - | - | 2 | L | 8.5  |
| I31CG2 | V36CG2 | - | X | - | - | - | - | X | - | - | - | - | - | 2 | L | 8.5  |
| I31CG1 | I32CO  | - | - | X | - | - | - | - | - | - | - | - | - | 1 | S | 10.0 |
| I31CO  | I32CA  | - | - | X | - | X | - | - | - | - | - | - | - | 2 | S | 7.5  |
| I31CD1 | V36CB  | - | - | X | - | - | - | - | - | - | - | - | - | 1 | L | 10.0 |
| I31CD1 | V36CG1 | - | - | X | - | - | - | - | - | - | - | - | - | 1 | L | 10.0 |
| I31CA  | V36CG1 | - | - | X | - | - | - | - | - | - | - | - | - | 1 | L | 10.0 |
| I31CB  | V36CG1 | - | - | X | - | - | - | - | - | - | - | - | - | 1 | L | 10.0 |
| I31CG1 | V36CG1 | - | - | X | - | - | - | X | - | - | - | - | - | 2 | L | 10.0 |
| I31CA  | V36CG2 | - | - | X | - | - | - | X | - | - | - | - | - | 2 | L | 10.0 |
| I31CB  | V39CG1 | - | - | X | - | - | - | - | - | - | - | - | - | 1 | L | 10.0 |
| I31N   | I32CO  | - | - | - | X | - | - | - | - | - | - | - | - | 1 | S | 12.0 |
| I31CB  | I32N   | - | - | - | X | - | - | - | - | - | - | - | - | 1 | S | 12.0 |
| I31N   | G33CO  | - | - | - | X | - | - | - | - | - | - | - | - | 1 | M | 12.0 |
| I31N   | V40CG1 | - | - | - | X | - | - | - | - | - | - | - | - | 1 | L | 12.0 |
| I31CG2 | V36CB  | - | - | - | - | - | X | - | - | - | - | - | - | 1 | L | 7.5  |
| I31CA  | I32N   | - | - | - | - | - | - | - | X | - | - | - | - | 1 | S | 6.5  |
| I32CG2 | G33CA  | X | - | X | - | - | X | X | - | - | - | - | - | 4 | S | 7.5  |
| I32CO  | G33CA  | X | X | X | - | X | X | X | - | - | - | X | - | 7 | S | 7.5  |
| I32CA  | G33CA  | - | X | - | - | X | X | X | - | - | - | - | - | 4 | S | 7.5  |
| I32CD1 | G33CA  | - | X | X | - | - | - | - | - | - | - | - | - | 2 | S | 8.5  |
| I32CB  | G33CA  | - | X | X | - | - | X | X | - | - | - | X | - | 5 | S | 7.5  |
| I32CG1 | G33CA  | - | - | X | - | - | - | - | - | - | - | X | - | 2 | S | 8.0  |
| I32CG2 | L34CA  | - | - | X | - | - | - | - | - | - | - | - | - | 1 | M | 10.0 |
| I32CG2 | L34CD2 | - | - | X | - | - | - | - | - | - | - | - | - | 1 | M | 10.0 |
| I32CG2 | L34CO  | - | - | X | - | - | - | - | - | - | - | - | - | 1 | M | 10.0 |
| I32CA  | G33N   | - | - | - | X | - | - | - | - | - | - | - | - | 1 | S | 12.0 |
| I32N   | L34CA  | - | - | - | X | - | - | - | - | - | - | - | - | 1 | M | 12.0 |
| I32CA  | L34N   | - | - | - | X | - | - | - | - | - | - | - | - | 1 | M | 12.0 |
| I32CD1 | L34N   | - | - | - | X | - | - | - | - | - | - | - | - | 1 | M | 12.0 |
| I32CG1 | L34N   | - | - | - | X | - | - | - | - | - | - | - | - | 1 | M | 12.0 |
| I32CG2 | L34N   | - | - | - | X | - | - | - | - | - | - | - | - | 1 | M | 12.0 |

|        |        |   |   |   |   |   |   |   |   |   |   |   |   |   |   |      |
|--------|--------|---|---|---|---|---|---|---|---|---|---|---|---|---|---|------|
| I32CO  | L34N   | - | - | - | X | - | - | - | - | - | - | - | - | 1 | M | 12.0 |
| I32CD1 | M35N   | - | - | - | X | - | - | - | - | - | - | - | - | 1 | M | 12.0 |
| I32CA  | G33CO  | - | - | - | - | - | X | - | - | - | - | - | - | 1 | S | 7.5  |
| I32CB  | G33CO  | - | - | - | - | - | X | - | - | - | - | - | - | 1 | S | 7.5  |
| I32CG2 | G33N   | - | - | - | - | - | - | - | X | X | - | - | - | 2 | S | 6.5  |
| G33CA  | L34CA  | X | X | X | - | X | X | X | - | - | - | - | - | 6 | S | 7.5  |
| G33CA  | L34CB  | X | X | X | - | - | X | X | - | - | - | - | - | 5 | S | 7.5  |
| G33CA  | L34CD1 | X | - | - | - | - | - | X | - | - | - | - | - | 2 | S | 8.5  |
| G33CA  | L34CD2 | X | X | X | - | - | X | X | - | - | - | X | - | 6 | S | 7.5  |
| G33CA  | L34CG  | X | X | - | - | - | X | X | - | - | - | - | - | 4 | S | 7.5  |
| G33CA  | L34CO  | X | X | X | - | X | X | - | - | - | - | X | - | 6 | S | 7.5  |
| G33CA  | V36CG1 | X | X | X | - | - | - | X | - | - | - | - | - | 4 | M | 8.5  |
| G33CA  | M35CG  | X | X | - | - | - | - | - | - | - | - | - | - | 2 | M | 8.5  |
| G33CO  | L34CA  | - | X | X | - | X | X | - | - | - | - | - | - | 4 | S | 7.5  |
| G33CA  | M35CB  | - | X | X | - | - | - | - | - | - | - | - | - | 2 | M | 8.5  |
| G33CA  | V36CB  | - | X | - | - | - | - | - | - | - | - | - | - | 1 | M | 8.5  |
| G33CO  | V36CG1 | - | X | - | - | - | - | - | - | - | - | - | - | 1 | M | 8.5  |
| G33CA  | V36CG2 | - | X | X | - | - | X | - | - | - | - | - | - | 3 | M | 7.5  |
| G33CA  | M35CO  | - | - | X | - | - | - | - | - | - | - | - | - | 1 | M | 10.0 |
| G33N   | M35CB  | - | - | - | X | - | - | - | - | - | - | - | - | 1 | M | 12.0 |
| G33CA  | M35N   | - | - | - | X | - | - | - | - | - | - | - | - | 1 | M | 12.0 |
| G33CO  | L34CO  | - | - | - | - | X | - | X | - | - | - | - | - | 2 | S | 7.5  |
| G33CO  | V36CA  | - | - | - | - | X | - | - | - | - | - | - | - | 1 | M | 7.5  |
| G33CO  | L34CB  | - | - | - | - | - | X | - | - | - | - | - | - | 1 | S | 7.5  |
| G33CO  | L34CD2 | - | - | - | - | - | X | - | - | - | - | - | - | 1 | S | 7.5  |
| G33CO  | L34CG  | - | - | - | - | - | X | X | - | - | - | - | - | 2 | S | 7.5  |
| G33CO  | V36CG2 | - | - | - | - | - | - | X | - | - | - | - | - | 1 | M | 10.0 |
| G33N   | L34CG  | - | - | - | - | - | - | - | X | X | - | - | - | 2 | S | 6.5  |
| G33CA  | V36CA  | - | - | - | - | - | - | - | - | - | - | X | - | 1 | M | 8.0  |
| L34CG  | M35CB  | X | X | X | - | - | - | - | - | - | - | - | - | 3 | S | 8.5  |
| L34CA  | M35CA  | X | X | X | - | - | X | X | - | - | - | - | - | 5 | S | 7.5  |
| L34CO  | M35CA  | X | X | - | - | X | X | - | - | - | - | X | - | 5 | S | 7.5  |
| L34CA  | M35CB  | X | X | X | - | - | X | - | - | - | - | - | - | 4 | S | 7.5  |
| L34CB  | M35CB  | X | X | X | - | - | X | - | - | - | - | - | - | 4 | S | 7.5  |
| L34CO  | M35CB  | X | X | X | - | - | X | X | - | - | - | - | - | 5 | S | 7.5  |
| L34CB  | M35CE  | X | X | X | - | - | - | - | - | - | - | - | - | 3 | S | 8.5  |
| L34CA  | M35CG  | X | X | X | - | - | X | X | - | - | - | - | - | 5 | S | 7.5  |
| L34CO  | M35CG  | X | X | X | - | - | X | - | - | - | - | X | - | 5 | S | 7.5  |
| L34CD1 | M35CA  | - | X | - | - | - | - | - | - | - | - | - | - | 1 | S | 8.5  |
| L34CD2 | M35CB  | - | X | X | - | - | - | - | - | - | - | - | - | 2 | S | 8.5  |
| L34CD1 | M35CB  | - | - | X | - | - | - | - | - | - | - | - | - | 1 | S | 10.0 |
| L34CD2 | M35CA  | - | - | X | - | X | - | - | - | - | - | X | - | 3 | S | 7.5  |
| L34CG  | M35CA  | - | - | X | - | - | X | - | - | - | - | - | - | 2 | S | 7.5  |
| L34CG  | M35CG  | - | - | X | - | - | - | X | - | - | - | - | - | 2 | S | 10.0 |
| L34CG  | M35CE  | - | - | X | - | - | - | - | - | - | - | - | - | 1 | S | 10.0 |
| L34CA  | V36CG1 | - | - | X | - | - | - | - | - | - | - | - | - | 1 | M | 10.0 |
| L34CO  | V36CG1 | - | - | X | - | - | - | - | - | - | - | - | - | 1 | M | 10.0 |
| L34N   | M35CA  | - | - | - | X | - | - | - | - | - | - | - | - | 1 | S | 12.0 |
| L34N   | M35CG  | - | - | - | X | - | - | - | - | - | - | - | - | 1 | S | 12.0 |
| L34N   | M35CO  | - | - | - | X | - | - | - | - | - | - | - | - | 1 | S | 12.0 |
| L34CB  | M35N   | - | - | - | X | - | - | - | - | - | - | - | - | 1 | S | 12.0 |
| L34N   | V36CG1 | - | - | - | X | - | - | - | X | X | - | - | - | 3 | M | 6.5  |
| L34N   | V36CG2 | - | - | - | X | - | - | - | - | - | - | - | - | 1 | M | 12.0 |
| L34CO  | M35CO  | - | - | - | - | X | - | X | - | - | - | X | - | 3 | S | 7.5  |

|        |        |   |   |   |   |   |   |   |   |   |   |   |   |   |   |      |
|--------|--------|---|---|---|---|---|---|---|---|---|---|---|---|---|---|------|
| L34CA  | M35CO  | - | - | - | - | - | X | - | - | - | - | - | - | 1 | S | 7.5  |
| L34CB  | M35CA  | - | - | - | - | - | X | X | - | - | - | X | - | 3 | S | 7.5  |
| L34CB  | M35CO  | - | - | - | - | - | X | - | - | - | - | - | - | 1 | S | 7.5  |
| L34CO  | V36CA  | - | - | - | - | - | - | - | - | - | - | X | - | 1 | M | 8.0  |
| L34CO  | V36CB  | - | - | - | - | - | - | - | - | - | - | X | - | 1 | M | 8.0  |
| M35CG  | V36CA  | X | X | X | - | - | - | - | - | - | - | - | - | 3 | S | 8.5  |
| M35CA  | V36CG1 | X | X | X | - | - | X | X | - | - | - | - | - | 5 | S | 7.5  |
| M35CA  | V36CA  | - | X | X | - | X | X | X | - | - | - | - | - | 5 | S | 7.5  |
| M35CB  | V36CA  | - | X | X | - | - | - | - | - | - | - | - | - | 2 | S | 8.5  |
| M35CG  | V36CB  | - | X | - | - | - | - | - | - | - | - | - | - | 1 | S | 8.5  |
| M35CB  | V36CG1 | - | X | X | - | - | - | - | - | - | - | - | - | 2 | S | 8.5  |
| M35CG  | V36CG1 | - | X | X | - | - | - | - | - | - | - | - | - | 2 | S | 8.5  |
| M35CB  | V36CG2 | - | X | - | - | - | - | - | - | - | - | - | - | 1 | S | 8.5  |
| M35CB  | G37CA  | - | X | - | - | - | - | - | - | - | - | - | - | 1 | M | 8.5  |
| M35CG  | G37CA  | - | X | - | - | - | - | - | - | - | - | - | - | 1 | M | 8.5  |
| M35CO  | V36CA  | - | - | X | - | - | - | - | - | - | - | X | - | 2 | S | 8.0  |
| M35CA  | V36CG2 | - | - | X | - | - | X | X | - | - | - | - | - | 3 | S | 7.5  |
| M35N   | V36CG2 | - | - | - | X | - | - | - | - | - | - | - | - | 1 | S | 12.0 |
| M35CG  | V36CO  | - | - | - | - | - | X | - | - | - | - | - | - | 1 | S | 7.5  |
| M35CO  | V36CG1 | - | - | - | - | - | X | X | - | - | - | - | - | 2 | S | 7.5  |
| M35CG  | V36CG2 | - | - | - | - | - | - | X | - | - | - | - | - | 1 | S | 10.0 |
| M35CO  | V36CG2 | - | - | - | - | - | - | X | - | - | - | - | - | 1 | S | 10.0 |
| V36CB  | G37CA  | X | - | X | - | - | X | X | - | - | - | - | - | 4 | S | 7.5  |
| V36CO  | G37CA  | X | - | - | - | - | - | X | - | - | - | - | - | 2 | S | 8.5  |
| V36CG2 | G37CO  | - | X | X | - | - | X | - | - | - | - | - | - | 3 | S | 7.5  |
| V36CB  | G37CO  | - | - | X | - | - | - | - | - | - | - | - | - | 1 | S | 10.0 |
| V36CG1 | G37CO  | - | - | X | - | - | - | - | - | - | - | - | - | 1 | S | 10.0 |
| V36CA  | G37N   | - | - | - | X | - | - | - | - | - | - | - | - | 1 | S | 12.0 |
| V36CG2 | G37N   | - | - | - | X | - | - | - | X | X | - | - | - | 3 | S | 6.5  |
| V36CO  | G37CO  | - | - | - | - | X | - | - | - | - | - | - | - | 1 | S | 7.5  |
| V36CG1 | G37CA  | - | - | - | - | - | X | - | - | - | - | - | - | 1 | S | 7.5  |
| V36CA  | G37CA  | - | - | - | - | - | X | - | - | - | - | - | - | 1 | S | 7.5  |
| V36CG1 | V39CB  | - | - | - | - | - | - | - | - | - | - | X | - | 1 | M | 8.0  |
| G37CA  | G38CA  | X | X | X | - | - | - | - | - | - | - | - | - | 3 | S | 8.5  |
| G37N   | V39CB  | - | - | - | X | - | - | - | - | - | - | - | - | 1 | M | 12.0 |
| G37N   | V39CG1 | - | - | - | - | - | - | - | - | X | - | - | - | 1 | M | 7.5  |
| G37CA  | V39CB  | - | - | - | - | - | - | - | - | - | - | X | - | 1 | M | 8.0  |
| V39CB  | I41CB  | X | - | - | - | - | - | - | - | - | - | - | - | 1 | M | 8.5  |
| V40CG2 | I41CB  | X | X | - | - | - | X | X | - | - | - | - | - | 4 | S | 7.5  |
| V40CA  | I41CB  | X | X | X | - | - | X | X | - | - | - | - | - | 5 | S | 7.5  |
| V40CA  | I41CG1 | X | X | X | - | - | X | X | - | - | - | - | - | 5 | S | 7.5  |
| V40CA  | I41CA  | - | X | X | - | - | X | X | - | - | - | - | - | 4 | S | 7.5  |
| V40CB  | I41CB  | - | X | X | - | - | - | - | - | - | - | - | - | 2 | S | 8.5  |
| V40CB  | I41CG1 | - | X | - | - | - | - | - | - | - | - | - | - | 1 | S | 8.5  |
| V40CB  | I41CD1 | - | X | - | - | - | - | - | - | - | - | - | - | 1 | S | 8.5  |
| V40CG2 | I41CD1 | - | X | - | - | - | - | - | - | - | - | - | - | 1 | S | 8.5  |
| V40CG2 | I41CG1 | - | - | X | - | - | - | X | - | - | - | - | - | 2 | S | 10.0 |
| V40CO  | I41CB  | - | - | X | - | - | - | - | - | - | - | - | - | 1 | S | 10.0 |
| V40CA  | I41CD1 | - | - | X | - | - | - | - | - | - | - | - | - | 1 | S | 10.0 |
| V40CA  | I41CG2 | - | - | X | - | - | X | - | - | - | - | - | - | 2 | S | 7.5  |
| V40CB  | I41CG2 | - | - | X | - | - | - | X | - | - | - | - | - | 2 | S | 10.0 |
| V40CG2 | I41CG2 | - | - | X | - | - | - | - | - | - | - | - | - | 1 | S | 10.0 |
| V40CO  | A42CO  | - | - | X | - | - | - | - | - | - | - | - | - | 1 | M | 10.0 |
| V40CO  | A42CB  | - | - | X | - | - | - | - | - | - | - | - | - | 1 | M | 10.0 |

|        |        |   |   |   |   |   |   |   |   |   |   |   |   |   |   |      |
|--------|--------|---|---|---|---|---|---|---|---|---|---|---|---|---|---|------|
| V40N   | I41CA  | - | - | - | X | - | - | - | - | - | - | - | - | 1 | S | 12.0 |
| V40N   | I41CB  | - | - | - | X | - | - | - | - | - | - | - | - | 1 | S | 12.0 |
| V40N   | I41CD1 | - | - | - | X | - | - | - | - | - | - | - | - | 1 | S | 12.0 |
| V40CA  | I41N   | - | - | - | X | - | - | - | - | - | - | - | - | 1 | S | 12.0 |
| V40CO  | I41N   | - | - | - | X | - | - | - | - | - | - | - | - | 1 | S | 12.0 |
| V40CG2 | I41CA  | - | - | - | - | - | X | - | - | - | - | - | - | 1 | S | 7.5  |
| V40CG2 | I41N   | - | - | - | - | - | - | X | X | - | - | - | - | 2 | S | 6.5  |
| V40CG2 | A42CA  | - | - | - | - | - | - | - | - | X | - | - | - | 1 | M | 7.5  |
| V40CB  | I41CO  | - | - | - | - | - | - | - | - | - | X | - | - | 1 | S | 8.0  |
| I41CG1 | A42CA  | X | X | X | - | - | - | X | - | - | - | X | - | 5 | S | 8.0  |
| I41CA  | A42CA  | - | X | X | - | - | X | X | - | - | - | - | - | 4 | S | 7.5  |
| I41CB  | A42CA  | - | X | X | - | - | X | - | - | - | - | X | - | 4 | S | 7.5  |
| I41CD1 | A42CA  | - | X | X | - | - | - | - | - | - | - | - | - | 2 | S | 8.5  |
| I41CG2 | A42CA  | - | X | X | - | - | X | - | - | - | - | - | - | 3 | S | 7.5  |
| I41CG2 | A42CO  | - | - | X | - | - | X | - | - | - | - | - | - | 2 | S | 7.5  |
| I41CO  | A42CO  | - | - | X | - | - | - | X | - | - | - | - | - | 2 | S | 10.0 |
| I41CB  | A42CB  | - | - | X | - | - | - | - | - | - | - | - | - | 1 | S | 10.0 |
| I41N   | A42CA  | - | - | - | X | - | - | - | - | - | - | - | - | 1 | S | 12.0 |
| I41CA  | A42N   | - | - | - | X | - | - | - | - | - | - | - | - | 1 | S | 12.0 |
| I41CA  | A42CB  | - | - | - | - | X | - | X | - | - | - | - | - | 2 | S | 7.5  |
| I41CA  | A42CO  | - | - | - | - | - | X | - | - | - | - | - | - | 1 | S | 7.5  |
| I41CB  | A42CO  | - | - | - | - | - | X | - | - | - | - | - | - | 1 | S | 7.5  |
| I41CG2 | A42N   | - | - | - | - | - | - | - | X | X | - | - | - | 2 | S | 6.5  |
| I41CO  | A42CA  | - | - | - | - | - | - | - | - | - | - | X | - | 1 | S | 8.0  |

SUMMARY:

SEQUENTIAL CONTACTS: 264  
MEDIUM RANGE CONTACTS: 93  
LONG RANGE CONTACTS: 104  
INTERMOLECULAR CONTACTS: 26

-----  
TOTAL w/o INTRARES.: 487
